1 The Limits to Parapatric Speciation II: Strengthening a  
2 Preexisting Genetic Barrier to Gene Flow in Parapatry.

3 Alexandre Blanckaert <sup>\*1,2</sup> and Joachim Hermisson<sup>1,3</sup>

4 <sup>1</sup>Department of Mathematics, University of Vienna, 1090 Vienna, Austria

5 <sup>2</sup>Instituto Gulbenkian de Ciência, 2780-156 Oeiras, Portugal

6 <sup>3</sup>Mathematics and Biosciences Group, Max F. Perutz Laboratories, 1030 Vienna, Austria

7 December 19, 2017

---

\*[ablanckaert@igc.gulbenkian.pt](mailto:ablanckaert@igc.gulbenkian.pt)

8 Short title: Strengthening a genetic barrier

9 **Abstract**

10 Parapatric speciation has recently received a lot of attention. By encompassing the  
11 whole continuum between allopatric and sympatric scenarios, it includes many potential  
12 scenarios for the evolution of new species. Building upon previous work, we investigate how  
13 a genetic barrier to gene flow, that relies on a single postzygotic genetic incompatibility, may  
14 further evolve. We consider a continent island model with three loci involved in pairwise  
15 Dobzhansky-Muller incompatibilities (DMIs). Using a deterministic and analytic approach,  
16 we derive the conditions for invasion of a new mutation and its consequences on an already  
17 existing genetic barrier to gene flow. We focus on quantifying the impact of the epistasis  
18 generated by the new mutation on the genetic barrier. We show that the accumulation  
19 of genetic incompatibilities in the presence of gene flow is a complex process, where new  
20 mutations can either strengthen or destroy a preexisting barrier. In particular, preexisting  
21 polymorphism and incompatibilities do not always facilitate the growth of the genetic barrier  
22 by accumulation of further barrier genes. Migration may disrupt the snowball effect (the  
23 accelerating rate of DMI accumulation in allopatry) because incompatibilities are directly  
24 tested by selection. Our results also show an ambiguous role of gene flow, which can either  
25 impede or facilitate the strengthening of the genetic barrier. Overall, our results illustrate  
26 how the inclusion of gene flow renders the building of a genetic barrier difficult to analyze.

27 Parapatric speciation has recently received a lot of attention. By encompassing the whole  
28 continuum between allopatric and sympatric scenarios, it includes many potential scenarios  
29 for the evolution of new species. Building upon previous work, we investigate how a genetic  
30 barrier to gene flow, that relies on a single postzygotic genetic incompatibility, may further  
31 evolve. We consider a continent island model with three loci involved in pairwise Dobzhansky-  
32 Muller incompatibilities (DMIs). Using a deterministic and analytic approach, we derive the  
33 conditions for invasion of a new mutation and its consequences on an already existing genetic  
34 barrier to gene flow. We focus on quantifying the impact of the epistasis generated by the new  
35 mutation on the genetic barrier. We show that the accumulation of genetic incompatibilities  
36 in the presence of gene flow is a complex process, where new mutations can either strengthen  
37 or destroy a preexisting barrier. In particular, preexisting polymorphism and incompatibilities  
38 do not always facilitate the growth of the genetic barrier by accumulation of further barrier  
39 genes. Migration may disrupt the snowball effect (the accelerating rate of DMI accumulation  
40 in allopatry) because incompatibilities are directly tested by selection. Our results also show  
41 an ambiguous role of gene flow, which can either impede or facilitate the strengthening of the  
42 genetic barrier. Overall, our results illustrate how the inclusion of gene flow renders the building  
43 of a genetic barrier difficult to analyze.

## 44 Introduction

45

46 Under what conditions can geographically separated populations that are connected by mi-  
47 gration build up a genetic barrier to gene flow? When and how can this barrier be strengthened  
48 and eventually lead to speciation? Following the increasing awareness that gene flow and hy-  
49 bridization between related (incipient) species is ubiquitous in both plants and animals (Mallet,  
50 2005; Butlin et al., 2008), these long-standing questions of parapatric speciation research are  
51 receiving renewed interest (Butlin et al., 2012; Bank et al., 2012; Flaxman et al., 2013, 2014;  
52 Paixão et al., 2014; Seehausen et al., 2014; Barnard-Kubow et al., 2016; Kulmuni and Westram,  
53 2017; Nosil et al., 2017; Yang et al., 2017). Answers to these questions strongly depend on the  
54 speciation mechanism that is considered. On the one hand, there are scenarios of “adaptive  
55 speciation” (Dieckmann, 2004; Weissing et al., 2011), where speciation (or the build-up of a ge-  
56 netic barrier) is a direct target of selection. The genetic barrier in this case is usually prezygotic  
57 and can result from the evolution of assortative mating. If speciation is driven by local com-  
58 petition (as in the classical scenario of sympatric speciation, Dieckmann and Doebeli (1999)),  
59 the probability or speed of speciation is unaffected by migration. Alternatively, if assortative  
60 mating evolves as a response against mating with maladaptive immigrants, migration is driving  
61 speciation in the first place (Servedio and Noor, 2003; Rettelbach et al., 2013). On the other  
62 hand, other scenarios consider speciation as a non-selected by-product of neutral or adaptive  
63 divergence. In particular, this is how reproductive isolation evolves in classical models of al-  
64 lopatric speciation (Orr, 1995; Orr and Turelli, 2001; Coyne and Orr, 2004). In contrast to the  
65 scenarios of adaptive speciation, in that case, migration is a potent force to prevent the build-up  
66 of a genetic barrier. Given that models of adaptive speciation require specific assumptions about  
67 the selection scheme and given the ubiquitous nature of gene flow, the question arises whether  
68 and when speciation as a by-product can occur in a parapatric model.

69 Following previous work (Bank et al., 2012; Flaxman et al., 2013; Akerman and Bürger, 2014;  
70 Aeschbacher and Bürger, 2014; Paixão et al., 2014; Fraïsse et al., 2014; Höllinger and Hermisson,  
71 2017), we study the conditions for the emergence of a postzygotic barrier to gene flow between  
72 parapatric populations. Two mechanisms can contribute to the build-up of such a barrier:  
73 local adaptation and genetic incompatibilities (Schluter, 2009; Bank et al., 2012; Kulmuni and  
74 Westram, 2017). Local adaptation and divergence driven by ecological differences among the  
75 populations is arguably the easiest mechanism to create a barrier in the presence of gene flow

76 (Flaxman et al., 2013; Akerman and Bürger, 2014). Any new mutation with a local fitness  
77 advantage larger than the migration rate can establish in the population. If this same mutation  
78 is detrimental in the other environment, the adaptation remains local and contributes to a fitness  
79 deficit of migrants. An increasing number of local adaptation genes along the chromosome can  
80 strengthen the barrier and reduce the effective rates of gene flow among populations. Speciation  
81 in the sense of full reproductive isolation corresponds to the limit where immigrants are “dead  
82 on arrival”. However, hybridization remains possible whenever populations can overlap at all, in  
83 any environment (or laboratory) where both are viable. This problem is avoided if the genetic  
84 barrier is due to genetic incompatibilities and selection acts primarily on hybrids rather than  
85 on (first generation) migrants. This is the insight of the Bateson-Dobzhansky-Muller model  
86 (Bateson, 1909; Dobzhansky, 1936; Muller, 1942) that has since become the standard model to  
87 explain speciation in an allopatric setting (Orr and Turelli, 2001; Coyne and Orr, 2004).

88 The two mechanisms, selection against migrants (i.e. local adaptation) and selection against  
89 hybrids (Dobzhansky-Muller incompatibilities, DMIs) are non-exclusive (Kulmuni and Westram,  
90 2017). In particular, whereas neutral DMIs cannot evolve in a parapatric setting (Gavrilets, 1997;  
91 Bank et al., 2012), DMIs can still evolve and be maintained if at least one of the incompatible  
92 alleles is also locally adaptive. Considering a continent-island scenario, Bank et al. (2012)  
93 characterized the conditions under which a simple 2-locus DMI can originate and be maintained  
94 in the face of gene flow – a very first step on the route to (potential) speciation. Here, we ask how  
95 this process can continue. Under which conditions will further substitutions in either population  
96 strengthen or weaken (or even destroy) an existing genetic barrier? It turns out that the answer  
97 to this question is surprisingly complex, depending on patterns of epistasis and on the genetic  
98 architecture and linkage pattern of the barrier genes involved. We discuss the potential of a new  
99 mutation to strengthen a barrier and whether it is a step towards reproductive isolation. Lastly,  
100 we characterize the genetic architecture that produced the strongest genetic barrier under gene  
101 flow and relate these results to the recent discussion of so-called “islands of divergence” (Via  
102 and West, 2008; Feder et al., 2012a).

## 103 Model

104 To study the accumulation of incompatibilities in the presence of gene flow, we use a  
105 migration-selection model in continuous time with three loci. We consider two panmictic pop-  
106 ulations, one on a continent and the other on an island, each of sufficient size such that we

107 can ignore the effects of genetic drift. There is unidirectional migration from the continental  
 108 population to the island population at rate  $m$ . Selection acts on three loci, **A**, **B**, and **C**, with  
 109 two alleles each (**A/a**, **B/b**, **C/c**). Lower case letters indicate the ancestral state, upper case  
 110 letters are derived alleles. We study both haploid and diploid populations. We always assume  
 111 that the continent is fixed for a unique genotype; substitutions on the continent can occur,  
 112 but they are instantaneous and do not lead to a persistent polymorphism. We focus on the  
 113 migration-selection dynamics on the island, where all three loci can be polymorphic.

## 114 Haploid model

115 There are  $2^3 = 8$  different haplotypes with frequencies  $x_1, x_2, \dots, x_8$ . In particular,  $x_1$  is  
 116 the frequency of the ancestral genotype **abc**, with Malthusian (or log-) fitness normalized to  
 117 0. We have three parameters for single-locus fitness effects,  $\alpha$ ,  $\beta$ , and  $\gamma$ . Three parameters  
 118  $\epsilon_{AB}$ ,  $\epsilon_{BC}$ , and  $\epsilon_{AC}$ , parametrize potential pairwise epistasis between derived alleles, see table 1.  
 119 Restrictions on epistasis values are detailed below.

| Hap.  | <b>abc</b> | <b>Abc</b> | <b>aBc</b> | <b>abC</b> | <b>ABc</b>                            | <b>AbC</b>                             | <b>aBC</b>                            | <b>ABC</b>                                                                     |
|-------|------------|------------|------------|------------|---------------------------------------|----------------------------------------|---------------------------------------|--------------------------------------------------------------------------------|
| $x_i$ | $x_1$      | $x_2$      | $x_3$      | $x_4$      | $x_5$                                 | $x_6$                                  | $x_7$                                 | $x_8$                                                                          |
| $w_i$ | 0          | $\alpha$   | $\beta$    | $\gamma$   | $\alpha + \beta$<br>$+ \epsilon_{AB}$ | $\alpha + \gamma$<br>$+ \epsilon_{AC}$ | $\beta + \gamma$<br>$+ \epsilon_{BC}$ | $\alpha + \beta + \gamma$<br>$+ \epsilon_{AB} + \epsilon_{BC} + \epsilon_{AC}$ |

Table 1: **Frequencies  $x_i$  and fitness values  $w_i$  of the different haplotypes for haploid populations. We always assume  $\alpha > 0$  and  $\epsilon_{AB} < 0$ .**

120 In the following, we assume that each locus has a specific role. In particular, we assume  
 121 that allele **A** is always an island adaptation (allele **A** appears on the island). As a consequence,  
 122  $\alpha$  is always strictly positive. In contrast, allele **B** is always a continental adaptation (allele  
 123 **B** appears on the continent). There is no constraint on its selective advantage,  $\beta$ , on the  
 124 island: both negative and positive values are investigated. We always assume that **A** and **B** are  
 125 incompatible, *i.e.*  $\epsilon_{AB} < 0$ . While loci **A** and **B** form the nucleus of a genetic barrier that exists  
 126 initially, any further extension of this barrier occurs on the **C** locus. At this locus, the new allele  
 127 **C** can appear either on the island or on the continent. There is no constraint on its selective  
 128 advantage,  $\gamma$ . **C** can interact positively or negatively with the other derived alleles. To keep  
 129 our model tractable, we only allow for epistasis between island and continental adaptations. In  
 130 other words, if **C** appears on the island, it only interacts with the continental adaptation **B**  
 131 ( $\epsilon_{AC} = 0$ ). Similarly, if **C** appears on the continent, epistasis only occurs between **A** and **C**

132 ( $\epsilon_{BC} = 0$ ). This excludes schemes of complex epistasis with interactions among all three locus  
133 pairs, or higher-order interactions.

134 Note that our choice for the role of loci **A**, **B**, and **C** is made to reduce the parameter space.  
135 Alternative scenarios can be easily deduced through reparametrization of the system, given in  
136 table A3 in the SI. Since the model is defined in continuous time, all parameters for selection or  
137 migration are rates. For the derivation of equilibria, only relative rates matter. In particular,  
138 we can scale all parameters by the selection coefficient  $\alpha$  of the **A** allele (which is always  $> 0$ ).

139 The three loci **A**, **B** and **C** can be located in any order along the genome. The full system  
140 with arbitrary linkage, given in equation (A2) is not tractable analytically. In our analysis, we  
141 therefore focus on limiting cases with pairs of loci either in tight linkage (recombination rate  
142  $r \rightarrow 0$ ) or in loose linkage. In our model, we implement loose linkage as the limit  $r \rightarrow \infty$ , which  
143 implies that the corresponding loci are always in linkage equilibrium. We relax this assumption  
144 in the SI, Fig. C24,C25, where we discuss numerical results for the dynamics with intermedi-  
145 ate recombination. The linkage equilibrium approximation holds as soon as recombination is  
146 stronger than the other evolutionary forces (selection and migration). This gives rise to five  
147 different linkage architectures: **ABC**, **AB-C**, **A-BC**, **AC-B**, **A-B-C**, where “-” denotes loose linkage  
148 and its absence tight linkage. We investigate these architectures both for **C** appearing on the  
149 island or on the continent respectively, leading to 10 different cases.

150 The dynamical equations for the allele frequencies on the island ( $p_A, p_B, p_C$  for allele **A**, **B**,  
151 **C**, resp.) for all cases are derived in the SI, equations (A6)-(A8). For example, we obtain for  
152 loose linkage (**A-B-C**),

$$\begin{aligned} \dot{p}_A &= p_A \left( (1 - p_A)(\alpha + p_B \epsilon_{AB} + p_C \epsilon_{AC}) - m \right) \\ \dot{p}_B &= p_B \left( (1 - p_B)(\beta + p_A \epsilon_{AB} + p_C \epsilon_{BC}) - m \right) + m \\ \dot{p}_C &= p_C \left( (1 - p_C)(\gamma + p_A \epsilon_{AC} + p_B \epsilon_{BC}) - m \right) + m_C \end{aligned} \quad (1)$$

153 where  $m_C = m$  or  $m_C = 0$ , depending on whether **C** appears on the continent or on the  
154 island.

## 155 Diploid model

156 We define the fitness scheme for diploids as follows: single-locus effects (*i.e.*  $\alpha, \beta, \gamma$ ) are  
157 purely additive. There is thus no dominance at this level. Dominance is, however, included for  
158 epistasis. Following previous work (Turelli and Orr, 2000; Bank et al., 2012), we assume that

159 the strength of epistasis depends only on the number of incompatible pairs in a genotype, e.g.  
 160 **AB/Ab** generates the same epistasis as **AB/aB**.

|                     | <b>A</b> bc | a <b>B</b> c                               | <b>A</b> <b>B</b> c                 |                     | <b>A</b> bc | a <b>B</b> c     | <b>A</b> <b>B</b> c                 |
|---------------------|-------------|--------------------------------------------|-------------------------------------|---------------------|-------------|------------------|-------------------------------------|
| <b>A</b> bc         | $2\alpha$   | $\alpha + \beta + \frac{\epsilon_{AB}}{2}$ | $2\alpha + \beta + \epsilon_{AB}$   | <b>A</b> bc         | $2\alpha$   | $\alpha + \beta$ | $2\alpha + \beta + \epsilon_{AB}$   |
| a <b>B</b> c        |             | $2\beta$                                   | $\alpha + 2\beta + \epsilon_{AB}$   | a <b>B</b> c        |             | $2\beta$         | $\alpha + 2\beta + \epsilon_{AB}$   |
| <b>A</b> <b>B</b> c |             |                                            | $2\alpha + 2\beta + 2\epsilon_{AB}$ | <b>A</b> <b>B</b> c |             |                  | $2\alpha + 2\beta + 2\epsilon_{AB}$ |

Table 2: Section of the fitness table specifying the interactions between the **A** and **B** alleles in the background of allele **c** for codominant (left) and recessive (right) epistasis. Interactions between **A** and **C** as well as **B** and **C** are analogous (the complete table is available in the SI, table A2).

161 We investigate two cases of dominance of the epistatic interaction: recessive and codominant  
 162 epistasis (see table 2). Assuming Hardy-Weinberg equilibrium on the island, the dynamical  
 163 system for diploids coincides with the haploid equation (given in equation (A2)) if we replace  
 164 the fitness of all haplotypes by the corresponding marginal fitness ( $\bar{w}_i = \sum_{j=1}^8 x_{ij}w_{ij}$ ). In the  
 165 case of the codominant model, the diploid dynamics reduce to the dynamics of the haploid model  
 166 if all interacting loci are in loose linkage, (~~**A-B-C**~~ as well as ~~**AC-B**~~ if **C** appears on the island,  
 167 and ~~**A-BC**~~ if **C** appears on the continent). The different systems of equations are available in  
 168 the SI, (see equations (A11)-(A15)).

### 169 Strength of the genetic barrier

170 There are multiple measures for the strength of a genetic barrier between two divergent  
 171 populations that are connected by gene flow. For example, the gene-flow factor (or the effective  
 172 migration rate) due to Barton and Bengtsson (1986) measures the reduced probability of neutral  
 173 alleles that are linked to barrier genes to cross this barrier and establish in the recipient popu-  
 174 lation. Here we consider the fate of barrier genes themselves. In particular, we are interested  
 175 in the maximum rate of gene flow under which a barrier (with given selection parameters) can  
 176 be built and also in the maximum rate of gene flow under which such a barrier can persist if it  
 177 exists initially.

178 Specifically, we define the barrier strength  $m_{max}^X$  for a given set of barrier loci as the maximal  
 179 migration rate under which a set **X** of alleles at these loci can still be maintained on the island.  
 180 Here, **X** denotes the barrier alleles that are not present on the continent, but are maintained on  
 181 the island as long as migration is below the threshold ( $m < m_{max}^X$ ). For example, for a single-  
 182 locus barrier with the **A** allele on the island, we have **X** = **A** and the strength of the genetic



183 barrier is given by  $m_{max}^A$ . For  $m < m_{max}^A$ , the **A** locus is polymorphic on the island, for  $m >$   
184  $m_{max}^A$ , the **A** allele is swamped and the locus is fixed for the continental **a** allele. Analogously,  
185 the strength of a genetic barrier with three polymorphic loci and island alleles **A**, **b**, and **C**  
186 (say) is denoted as  $m_{max}^{AbC}$ . The two-locus barrier  $m_{max}^+$  from Bank et al. (2012) corresponds to  
187  $m_{max}^{Ab}$  with this notation.

188 Below, we consider how the strength of an existing genetic barrier changes under further  
189 evolution. We then denote the original barrier strength, which serves as the reference point,  
190 as  $m_{max,0}^X$  (e.g.,  $m_{max,0}^{Ab}$  is the initial strength of an **AB** barrier with the third locus **C** fixed for  
191 its ancestral allele **c**). While  $m < m_{max}^X$  guarantees that an existing DMI is not swamped, the  
192 origin of the DMI may require a favorable evolutionary history (mutation order) or an initial  
193 allopatric phase, (Bank et al., 2012).

## 194 Results

### 195 Adaptation at existing barrier loci

196 In the first part of the results section, we study the case where further adaptation happens  
197 directly at an already existing barrier locus (i.e., at a locus **C** in tight linkage to such a locus).  
198 In particular, we compare the simple case of further adaptation at a single barrier locus with  
199 the more complex scenario where adaptation happens at a barrier locus that is involved in a  
200 2-locus incompatibility.

201 **Further adaptation at a single-locus barrier** Assume that, initially, **A** is the only poly-  
202 morphic locus. The initial barrier strength is  $\alpha$  and results entirely from local adaptation  
203 ( $m_{max,0}^A = \alpha$ ). A new mutation occurs at a tightly linked locus, **C**. This scenario is equivalent  
204 to adaptation at a single compound locus **AC** with alleles **Ac** and **ac** and mutation generating  
205 new alleles **AC** with fitness  $\alpha + \gamma$  and **aC** with fitness  $\gamma$ . At most two alleles can be maintained  
206 on the island (Nagylaki and Lou, 2001): the continental allele and the allele with the highest  
207 fitness on the island. Thus, any new adaptation on the island that produces a better allele than  
208 **Ac** will replace this allele (eg., the **AC** allele for  $\gamma > 0$ ). While any successful adaptation on the  
209 island increases the barrier strength ( $m_{max}^{AC} = \alpha + \gamma$ ), adaptation on the continent can lead to a  
210 stronger or weaker barrier ( $m_{max}^A = \alpha - \gamma$ ), depending on whether  $\gamma$  is positive or negative. In  
211 particular,  $m_{max}^A \leq 0$  means that no polymorphism can be maintained. However, if there is a  
212 small but non-zero recombination probability among **A** and **C**, any adaptation on the continent

213 will eventually also enter the island background. We then have two new alleles **AC** and **aC**  
 214 replacing the old ones (**Ac** and **ac**) and the barrier strength  $m_{max}^A = \alpha$  remains unchanged as  
 215 long as there is no epistasis among **A** and **C**.

216 We thus see that further adaptation at a single polymorphic locus will usually strengthen  
 217 the genetic barrier, rather than weaken it. In particular, this holds for any further adaptation  
 218 on the island. The only exception is adaptation on the continent that is also beneficial on the  
 219 island and cannot be combined with an existing island adaptation (i.e. the combined allele **AC**  
 220 is not possible or deleterious). A 3-locus architecture **ABC** with tight linkage among all three  
 221 loci leads to an analogous single-locus problem (after appropriate relabeling of parameters).

222 Note that the genetic barrier formed by a single locus relies exclusively on local adaptation:  
 223 any isolation observed is due to the impossibility of coexisting in a common environment and  
 224 not due to a genetic mechanism. This is different for barriers with multiple interacting loci,  
 225 which is our focus in the remainder of the manuscript.

226 **Further adaptation at a two-locus barrier** Assume now that we start with a 2-locus  
 227 polymorphism at two incompatible loci **A** and **B** (a 2-locus DMI) in loose linkage. The continental  
 228 haplotype is **aB**, and **Ab** is the fittest haplotype on the island. A new mutation appears on the  
 229 island at a locus **C** in tight linkage with **A**. As discussed in the previous section, this generates  
 230 a compound locus **AC**. The new mutation generates a third allele at this compound locus (e.g.  
 231 **AC**), which we will call the **A'** allele in the following. We denote the fitness advantage of the  
 232 new allele **A'** as  $\alpha'$  and its epistatic interaction with the **B** allele at the **B** locus as  $\epsilon_{A'B}$ . This  
 233 leads to the dynamics of a triallelic locus (with alleles **a**, **A** and **A'**) that interacts with a loosely  
 234 linked biallelic locus in the genomic background (alleles **b** and **B**):

$$\begin{aligned} \dot{p}_A &= p_A ((1 - p_A)(\alpha + p_B \epsilon_{AB}) - p_{A'}(\alpha' + p_B \epsilon_{A'B}) - m) \\ \dot{p}_{A'} &= p_{A'} ((1 - p_{A'}) (\alpha' + p_B \epsilon_{A'B}) - p_A(\alpha + p_B \epsilon_{AB}) - m) \\ \dot{p}_B &= (1 - p_B) (p_B(\beta + p_A \epsilon_{AB} + p_{A'} \epsilon_{A'B}) + m) \end{aligned} \quad (2)$$

235 (For tight linkage, we can assume that a fourth allele **A''** (e.g. **A''**= **aC**) will only originate  
 236 by mutation or rare recombination after one of the alleles **a**, **A**, and **A'** is lost. This leads again  
 237 to the three-allele dynamics described by Eq. (2). Results for the four-allele dynamics are given  
 238 in the SI, section C 2.4)

239 The dynamical system, given in equation (2) allows up to 9 equilibria, up to 3 of which  
 240 can be simultaneously stable. In the SI, section B 2, we show that alleles **A** and **A'** can never

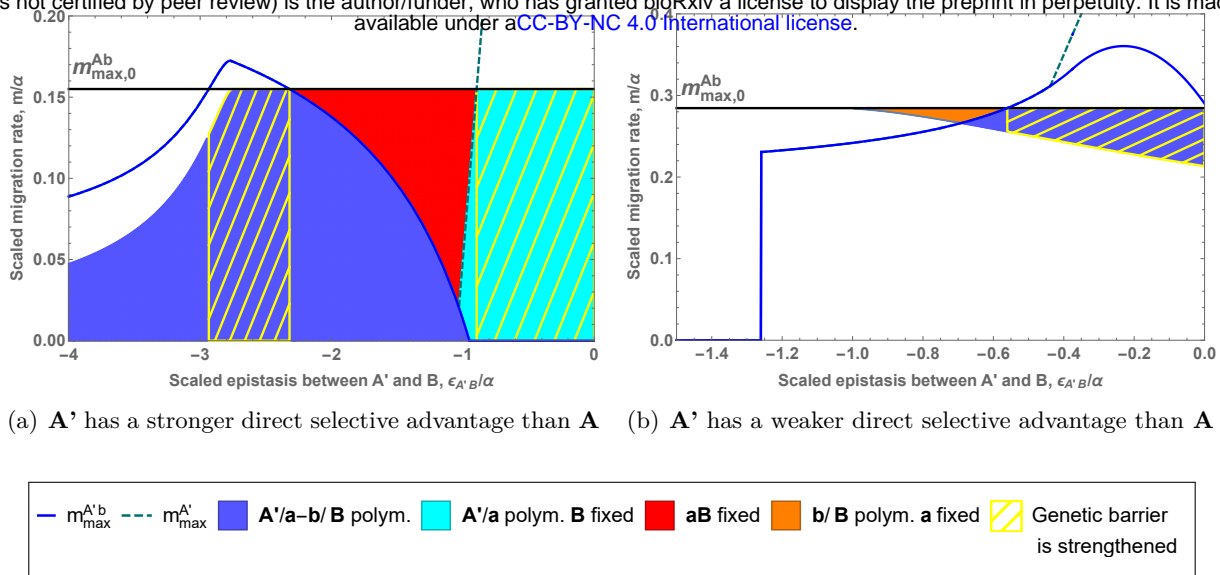

Figure 1: **The impact of the invasion of a new allele  $A'$  at locus  $A$  on an existing 2-locus barrier (loci  $A$ ,  $B$  in loose linkage).**

We show the strength of a genetic barrier to swamping for a new allele  $A'$  as a function of its (scaled) epistatic coefficient. The strength of the original genetic barrier is indicated by the black line. In both examples, we have  $m_{max,0}^{Ab} = m_{max,0}^A$ . Invasion of allele  $A'$  can only happen in a finite interval for  $m$ , (equation (B7) for explicit expressions), corresponding to the colored area. There are four possible outcomes to the successful invasion of the  $A'$  allele, denoted by the background color:  $A'$  replaces  $A$  and  $b$  remains present (in blue),  $A'$  replaces  $A$  but allele  $B$  fixes (in cyan), the polymorphism at locus  $A$  is lost (orange) and the continental haplotype fixes (red). If  $A'$  successfully replaces  $A$ , the new 2-locus barrier strength,  $m_{max}^{A'b}$ , is given by the blue line. The dashed cyan line shows the strength of the new single-locus barrier,  $m_{max}^{A'}$ , whenever the  $B$  locus is swamped and  $m_{max}^{A'} > m_{max}^{A'b}$ . The yellow hatched area indicates that the genetic barrier at the  $A$  locus is strengthened by the invasion of allele  $A'$ . Panel a) is obtained for  $\frac{\beta}{\alpha} = 0.95$ ,  $\frac{\alpha'}{\alpha} = 1.05$  and  $\frac{\epsilon_{AB}}{\alpha} = -2.5$  and panel b) for  $\frac{\beta}{\alpha} = -0.28$ ,  $\frac{\alpha'}{\alpha} = 0.75$  and  $\frac{\epsilon_{AB}}{\alpha} = -2.1$ .

241 coexist at a stable equilibrium (extending the single-locus result of Nagylaki and Lou (2001)).  
 242 Nevertheless, interaction of  $A$  with an unlinked locus  $B$  considerably adds to the complexity and  
 243 can lead to qualitatively different results.

244 Whereas  $A$  and  $A'$  can not coexist, allele  $A'$  can still invade the equilibrium formed by  
 245 the DMI between loci  $A$  and  $B$ . In contrast to the single-locus case, the potential for  $A'$  to  
 246 invade does no longer depend only on the fitness values, but also on the strength of migration  
 247 (analytical expressions of the bounds are given in equation B7). In Fig. 1, invasion of  $A'$  is  
 248 possible in all colored regions. Fig. 1(a) shows invasion of an allele  $A'$  with larger direct effect  
 249  $\alpha' > \alpha$ . If negative epistasis is less severe for  $A'$  than for  $A$  ( $\epsilon_{AB} < \epsilon_{A'B} < 0$ ),  $A'$  will always  
 250 invade (i.e. up to the maximal migration rate,  $m_{max,0}^{Ab}$ , of the original two-locus polymorphism).  
 251 However, for strong negative epistasis of the new allele ( $\epsilon_{A'B} < \epsilon_{AB} < 0$ ) invasion of  $A'$  is only  
 252 possible for weak migration  $m \ll m_{max,0}^{Ab}$  and a sufficiently low frequency of the competing  $B$   
 253 allele on the island. Fig. 1(b) shows that the  $A'$  allele can also invade if its direct effect is

254 weaker ( $\alpha' < \alpha$ ), provided negative epistasis is also weaker ( $\epsilon_{AB} < \epsilon_{A'B} < 0$ ). This requires  
255 that migration is sufficiently strong, because the marginal fitness of **A'** becomes larger than the  
256 marginal fitness of **A** only for a sufficiently large frequency of **B** alleles.

257 Successful invasion of **A'** can have qualitatively different outcomes, indicated by the different  
258 colors in Fig. 1. In many cases, an invading **A'** allele displaces the old **A** allele and the system  
259 settles at a new equilibrium with an **a/A'** polymorphism. The new equilibrium can either be a  
260 two-locus polymorphism (blue areas in Fig. 1) or a single-locus polymorphism with the **B** locus  
261 fixed for the **B** allele (cyan area). In both cases, the strength of the genetic barrier with respect  
262 to swamping can either increase (blue or cyan line above the black line) or decrease (blue or  
263 cyan line below the black line). Parameter ranges where invasion leads to a stronger genetic  
264 barrier,  $m_{max}^{A'b} > m_{max,0}^{Ab}$ , or  $m_{max}^{A'} > m_{max,0}^A$ , are indicated by yellow hatches.

265 Strengthening of the 2-locus barrier (blue area with yellow hatches in Fig. 1) can be due  
266 to two mechanisms. First, selection against migrants can be stronger due to additional local  
267 adaptation ( $\alpha' > \alpha$ ) and therefore leads to a larger fitness deficit ( $\alpha' - \beta$ ) for the continental  
268 haplotype on the island. This is the same mechanism as for the single-locus case. The genetic  
269 barrier is strengthened as long as epistasis,  $\epsilon_{A'B}$ , does not deviate too much from the epistasis  
270 generated by the previous allele,  $\epsilon_{AB}$  (Fig. 1(a), blue line above the black line). Indeed, if  
271 epistasis is too weak, the boost provided by the increased selection against migrants is negated  
272 by the weakening of selection against hybrids (since  $\beta > 0$ ). If epistasis is too strong, on the  
273 other hand, the marginal fitness of allele **A'** is decreased due to the increased cost of hybrids.  
274 Allele **A** can invade such an equilibrium as soon as migration increases and **A'** cannot strengthen  
275 the genetic barrier (see also section B 6 in SI).

276 The alternative mechanism corresponds to the reduction of selection against hybrids, Fig. 1(b).  
277 It works only if the continental **B** allele is deleterious on the island. Indeed, in this scenario,  
278 selection against hybrids does not contribute to the genetic barrier, as **B** is already maladaptive  
279 on the island. Nevertheless, epistasis still generates a cost for the island adaptation through the  
280 production of hybrids. Therefore, releasing the selective pressure on locus **A** due to the hybrid  
281 cost ( $\epsilon_{AB} \ll \epsilon_{A'B}$ ) can strengthen the genetic barrier, even if this relief is associated with a  
282 reduction of the direct selective advantage of the island adaptation ( $\alpha' < \alpha$ ). The reduction of  
283 the selection against migrants is here compensated by the much lower hybrid cost paid by allele  
284 **A'** relative to allele **A**.

285 In contrast to the single-locus case, invasion of **A'** does not imply that this allele is maintained  
286 in the population. Indeed, we find significant parameter regions, where the following scenario

287 happens. First, allele **A'** invades the island population (at its initial equilibrium with two-locus  
288 polymorphism), leading to the loss of the **A** allele. In the absence of allele **A**, allele **B** is no longer  
289 repressed and increases in frequency, making it impossible for allele **A'** to maintain itself in the  
290 population. Consequently, the continental **a** allele swamps the island and the polymorphism at  
291 the **A** locus is lost altogether (red and orange areas in Fig. 1). Again, the polymorphism at the **B**  
292 locus can either be maintained (orange area, Figure 1(b)) or destroyed (red, Fig. 1(a)). Clearly,  
293 a necessary condition for such behavior is that the original 2-locus polymorphism is not globally  
294 stable in the original **a/A**, **b/B** state space, but bistable together with an equilibrium with  
295 the **a** allele fixed. Numerical evidence strongly suggests that the fate of an invading **A'** allele  
296 depends on the existence of a stable **a/A'** polymorphism in the state space spanned by **a/A'**,  
297 **b/B**. If it does, the **A'** allele will eventually establish (as discussed above), if it does not, the **a**  
298 allele will take over. (We did not find a case where the **A** allele would return and displace **A'**  
299 once the latter has been able to invade; see also section B 3 in SI, for a more detailed discussion  
300 and some proofs for specific cases).

301 A new allele **A'** can thus function as a temporary state that enables switching among different  
302 equilibria of the original 2-locus 2-allele system. In the examples discussed above, temporary  
303 invasion of **A'** will destroy a DMI polymorphism in this case. However, we also observe the  
304 opposite phenomenon: invasion of **A'** may create an **a/A-b/B** polymorphism rather than de-  
305 stroying it. This is illustrated in Fig. 2. Bank et al. (2012) described the origin of such a DMI as  
306 a result of secondary contact (or a similar starting condition). Here, we provide an alternative  
307 explanation that does not require an interruption of gene flow.

308 We can compare the consequences of further adaptation on the island at an existing genetic  
309 barrier in the two cases discussed so far: a single polymorphic locus **A** and a polymorphic locus  
310 **A** that interacts with a second polymorphic locus **B**. There are two notable differences:

- 311 • While further adaptation on the island always leads to a stronger barrier in the single-locus  
312 case, this is not the case for a 2-locus barrier. Furthermore, invasion of a new allele no  
313 longer even guarantees establishment of this allele. On the contrary, we see that such an  
314 event can erase the existing barrier entirely.
- 315 • The potential to strengthen the genetic barrier does not only depend on the fitness land-  
316 scape, but also on the migration rate. Suppose that an allele **A'** exists that leads to a  
317 stronger barrier than **A** – if it invades. Fig. 1 shows that invasion may either require  
318 sufficiently weak (Fig. 1(a)), or sufficiently strong migration (Fig. 1(b)). The latter sce-

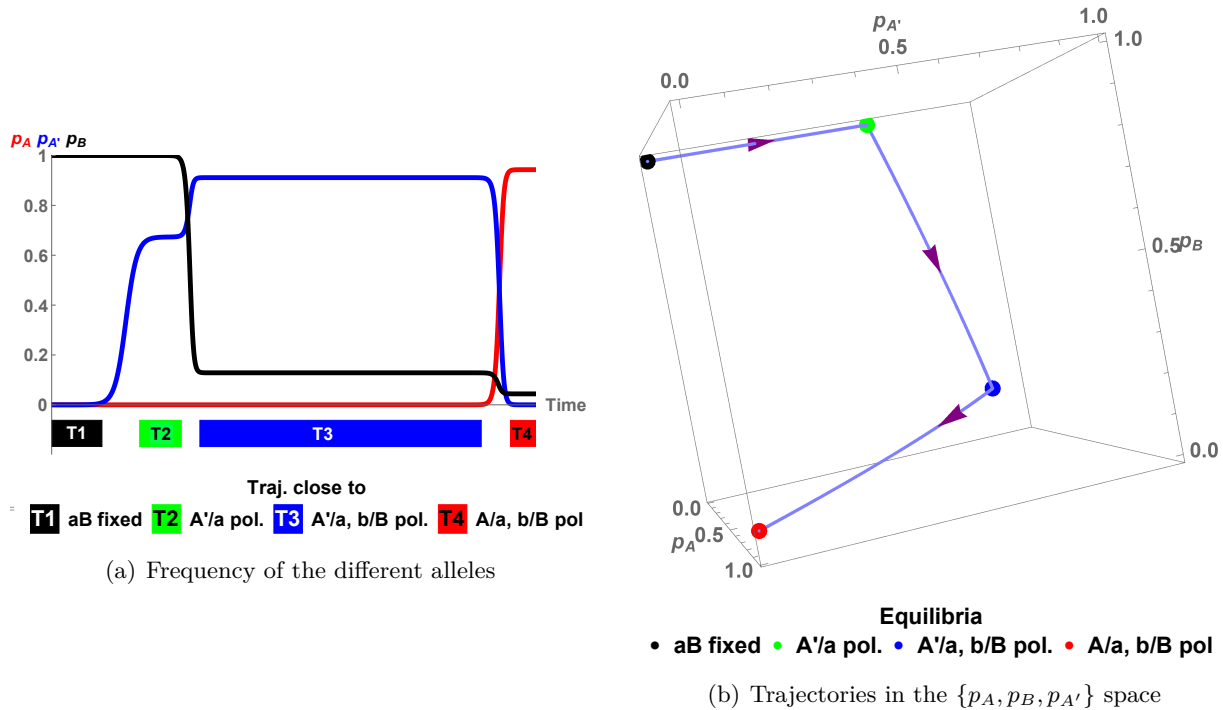

Figure 2: Evolutionary trajectory with  $A'$  as transient state.

a) Frequency of derived alleles  $B$  (black),  $A$  (red), and  $A'$  (blue) as a function of time. At  $t=0$ , the population is almost monomorphic, for the continental haplotype  $aB$ , with both the allele  $A$  and  $A'$  present at an extremely low frequency ( $\approx 10^{-6}$ ). Colored blocks T1-T4 indicate when the population is close to an equilibrium, with the color matching the corresponding equilibrium. b) We represent the same trajectory in the  $\{p_A, p_B, p_{A'}\}$  space. Dots indicate equilibria, as indicated. Arrows indicate the evolutionary trajectory. Parameters used are:  $\frac{\beta}{\alpha} = \frac{13}{300}$ ,  $\frac{\alpha'}{\alpha} = \frac{2}{3}$ ,  $\frac{\epsilon_{AB}}{\alpha} = -\frac{4}{3}$ ,  $\frac{\epsilon_{A'B}}{\alpha} = -\frac{151}{300}$ ,  $\frac{m}{\alpha} = \frac{4}{75}$ . One can observe a similar behavior with locus  $B$  starting polymorphic and allele  $B$  deleterious on the island, see Fig. B2.

319 nario leads to the interesting observation that stronger gene flow can sometimes trigger  
320 the evolution of stronger barriers to gene flow (in Fig. 1(b),  $m_{max}^{A'b} > m_{max,0}^{Ab}$ , the blue line  
321 is above the black line. Invasion of the new mutant is only possible with relatively strong  
322 migration (colored area in the figure)).

323 We also observe a general trend to replace a polymorphism that is maintained by selection  
324 against hybrids by one that is maintained due to selection against immigrants. Indeed, whereas  
325 it is possible to strengthen the genetic barrier by weakening the strength of epistasis without  
326 affecting the amount of local adaptation, the opposite is impossible. Any increase in the strength  
327 of selection against hybrids needs to be associated to some increase in local adaptation.

328 Further adaptation at locus **A** on the continent or at locus **B** on the island are equivalent  
329 to the one locus case, since the new alleles, **a'** or **b'** cannot generate epistasis with **B** or **A**  
330 respectively (assumption of the model). Further adaptation at **B** on the continent is treated in  
331 the SI, section B 7. If  $\beta' < 0$ , strengthening of the barrier is more likely with weaker epistasis,  
332 whereas if  $\beta' > 0$  most of strengthening happens if the incompatibility gets stronger. If **B'** is  
333 much more deleterious than **B** on the island, the genetic barrier is strengthened regardless of  
334 epistasis.

### 335 **Extension of the genetic barrier**

336 We now turn to the extension of a genetic barrier by adaptation at an interacting locus **C**  
337 that is far away from the existing barrier loci and only loosely linked. We start with going from  
338 one to two loci and then study the case when a third locus is added.

339 **Extension of a single-locus genetic barrier** Assume that **B** is the only polymorphic locus  
340 on the island ( $\beta < 0$ , therefore  $m_{max,0}^b = -\beta$ ) and a new mutation **C** occurs on the island at a  
341 loosely linked locus **C**. In the absence of epistasis, this mutation can invade and establish if and  
342 only if  $\gamma > m$ . **C** does not affect the barrier at all.

343 Fig. 3(b) shows the effect of epistasis between **C** and **B** on the barrier strength. As expected,  
344 negative epistasis can strengthen the genetic barrier (blue area), while positive epistasis will  
345 almost always weaken it (orange and red areas). The figure also shows, however, that negative  
346 epistasis is not sufficient to strengthen the barrier. Indeed, a **C** allele may invade for sufficiently  
347 weak migration, but will be the first polymorphism swamped once migration increases (grey  
348 area). Obviously, in this case, the barrier strength  $m_{max}^b$  at the polymorphic **B** locus remains  
349 unaffected.

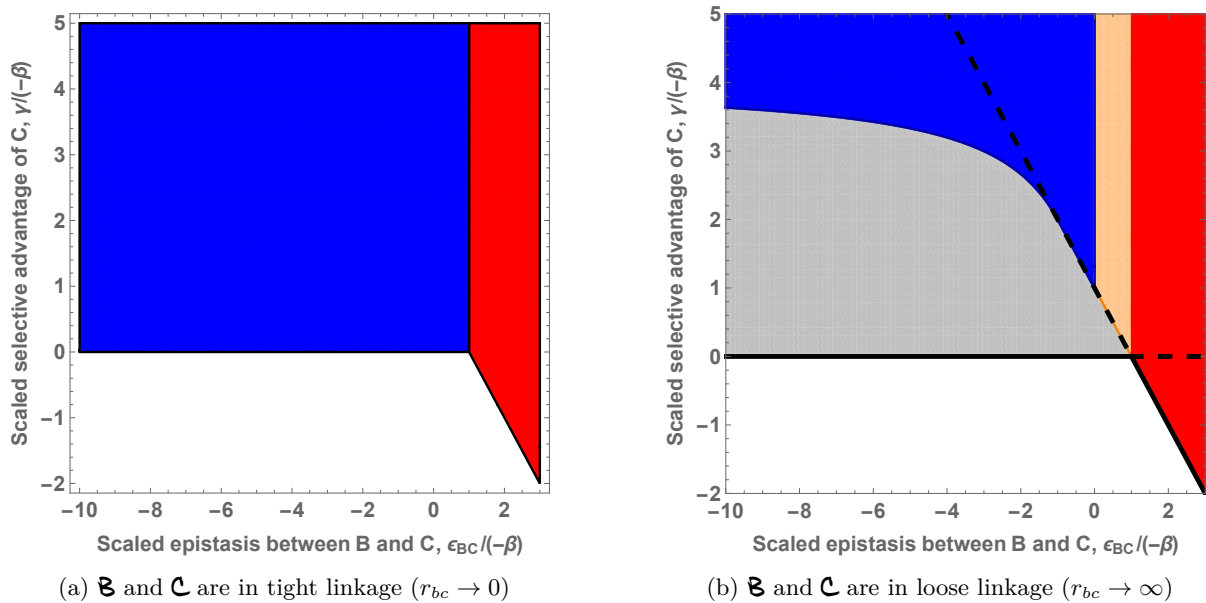

Figure 3: **C** strengthens the genetic barrier formed by a single polymorphic locus: comparison between a new mutation in tight linkage and one in loose linkage

The x-axis shows the strength of epistasis between **B** and **C**. The y-axis shows the selective advantage of new allele **C**. The background color indicates the consequence of the invasion of allele **C** on the genetic barrier at the **B** locus. Gray: the genetic barrier remains unchanged; blue: the genetic barrier is strengthened; orange: the genetic barrier is weakened; red: the polymorphism at locus **B** is lost. In addition, on panel b), the solid black line gives the necessary condition for invasion of allele **C** on the island. Below this bound invasion is always impossible. The black dashed line gives the sufficient condition for invasion. Above this bound, allele **C** can always invade, regardless of the migration rate (provided the polymorphism at the **B** locus still exists). Analytical expressions for the two lines are given in SI, equation (C2).

350 It is instructive to see how linkage affects the parameter range where further adaptation  
 351 leads to a stronger barrier. For tight linkage (adaptation at the polymorphic locus itself), any  
 352 allele with  $\gamma > 0$  will invade the island and will strengthen the barrier, see Fig. 3(a), as long  
 353 as epistasis does not cancel the selective disadvantage of allele **B** ( $\epsilon_{BC} + \beta > 0$ ). In contrast,  
 354 strengthening the barrier by adaptation at a loosely linked locus is much more difficult. To  
 355 reinforce the barrier at the loosely linked **B** locus, the new **C** allele has to withstand both  
 356 migration for  $m > m_{max}^b$  and the hybrid cost generated by its interaction with allele **B**. The  
 357 first condition alone implies  $\gamma > -\beta$  as a necessary condition for a stronger barrier. Indeed, for  
 358 a given  $\gamma > -\beta$ , the genetic barrier  $m_{max}^b$  is strengthened as long as negative epistasis is not  
 359 too strong. Stronger epistasis results in larger hybrid cost for **C** and therefore a larger direct  
 360 effect (larger  $\gamma$ ) is needed to compensate for it. For  $\gamma > -4\beta$ , the barrier is strengthened for  
 361 any negative epistasis, including a lethal incompatibility.



362 Finally even if a new **C** allele would strengthen the barrier (blue area), it is not always able  
363 to invade. Invasion of allele **C** requires

$$\gamma > m\left(1 + \frac{\epsilon_{BC}}{\beta}\right) \quad (3)$$

364 From equation (3), one can deduce that a necessary condition for invasion of allele **C** is  $\gamma > 0$   
365 and a sufficient one is  $\gamma > -(\beta + \epsilon_{BC})$ . For any  $\gamma$  value between these two limits, invasion will  
366 be possible only if migration is sufficiently small. Such a constraint does not exist for the tight  
367 linkage case, as migration does not affect the fate of new allele (given **B** remains polymorphic).

368 So far, we have considered the interaction of a new island adaptation **C** with a continental  
369 adaptation **B**. Alternatively, there are two others possibilities: we can also study interactions  
370 between **B** and a new continental adaptation or interactions among two island adaptations. The  
371 results are similar, see Fig. C2, C3 and our discussion in the SI.

372 **Extension of a two-locus genetic barrier** To complete the analysis of this section, we  
373 now ask how an existing genetic barrier of two interacting loci in loose linkage is affected by  
374 adaptation at a third locus that is also in loose linkage with the previous ones. We focus, in  
375 particular, on the question how a continental allele (the **B** allele at the **B** locus) can be prevented  
376 from swamping the island. Depending on the direct fitness effect  $\beta$  of this allele on the island,  
377 we find similarities or differences to the extension from 1 to 2 loci discussed above.

378 If the continental adaptation **B** is deleterious on the island ( $\beta < 0$ ), direct selection against  
379 migrants (all carrying allele **B**) contributes to the genetic barrier,  $m_{max}^b$ , at that locus. As  
380 Fig. 4(a) shows, transition from two to three loci is analogous to the step from 1 to 2 loci and  
381 also the qualitative results agree (see SI section C 1.2 for details). Indeed, the presence of a first  
382 island adaptation (the **A** allele) does not make it any easier for a second, loosely linked island  
383 adaptation (the **C** allele) to strengthen the genetic barrier. In particular, the **C** allele still needs  
384 to have a stronger direct effect (in magnitude) than **B**,  $\gamma > -\beta$ . Allele **C** also needs to interact  
385 negatively with allele **B**,  $\epsilon_{BC} < 0$ . Finally, since this interaction generates some hybrid cost,  
386 this cost must be compensated by some extra local adaptation (larger  $\gamma$ ). For example, a new  
387 mutation, interacting with allele **B**, with a direct selective advantage  $\gamma$  slightly larger than  $-\beta$ ,  
388 might not be able to strengthen the genetic barrier even if it fulfills the first criteria. These  
389 conditions are analogous to the 1 to 2-locus barrier transition, see Fig. 3(b), gray area above  
390 the  $\frac{-\gamma}{\beta} = 1$  line. However, **C** can be weaker than the **A** adaptation ( $\gamma < \alpha$ ) and still lead to a  
391 stronger barrier, see Fig. 4(a).

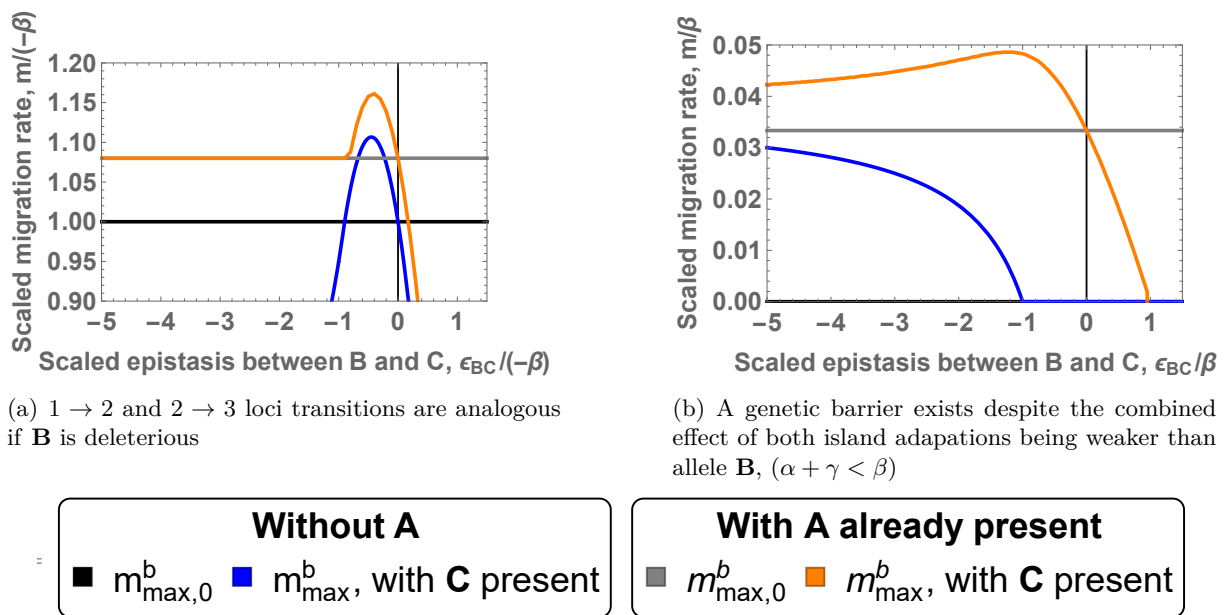

Figure 4:  $m_{max}^b$  for two and three loci in loose linkage

The x-axis corresponds to the epistasis between alleles **B** and **C**. The y-axis measures migration rate. The different lines correspond to  $m_{max}^b$ , the resistance to swamping at locus **B** under different scenarios. The initial single-locus and two-locus barriers,  $m_{max,0}^b \leq m_{max,0}^{Ab}$ , are given in black and gray. The impact of a new allele **C** on the single-locus and two-locus genetic barrier is represented by the blue and orange lines, respectively. Allele **B** is deleterious on the island for panel a) and advantageous on the island for panel b). The thin vertical black line indicates the absence of epistasis. Panel a) is obtained for ( $\frac{\alpha}{-\beta} = 2$ ,  $\frac{\gamma}{-\beta} = 1.9$  and  $\frac{\epsilon_{AB}}{-\beta} = -0.2$ ) and panel b) for ( $\frac{\alpha}{\beta} = 0.2$ ,  $\frac{\gamma}{\beta} = 0.15$  and  $\frac{\epsilon_{AB}}{\beta} = -3$ ).

392 We now consider a continental allele **B** that is beneficial also on the island, Fig. 4(b). In the  
393 haploid model, a single-locus genetic barrier is impossible. A genetic barrier can be formed if a  
394 second polymorphic locus, **C**, interacts with **B** through negative epistasis, generating selection  
395 against hybrids. However, a stable genetic barrier only exists if the direct and the epistatic effect  
396 of the **C** allele are both strong,  $\epsilon_{BC} < -\beta - m$  and  $\gamma > 4m$ , (see section C 1.1.2 in the SI for  
397 details), represented by the blue line in Fig. 4.

398 Consider now such a two-locus barrier between loci **A** and **B**. We want to investigate under  
399 which conditions a polymorphism at a loosely linked locus **C** strengthens the barrier against  
400 swamping at the **B** locus,  $m_{max}^b$  (orange line on Fig. 4). With an **A** allele already present,  
401 there is no lower bound for the negative epistasis of the new **C** allele: any value  $\epsilon_{BC}$  ( $\epsilon_{BC} < 0$ )  
402 can increase the barrier strength. The new allele still has to fulfill a condition on the direct  
403 effect:  $\gamma > m_{max,0}^b$ . Otherwise, allele **C** is the first allele that is lost when gene flow increases.  
404 However, the condition is weaker than the one on the **A** allele; indeed  $\gamma > \alpha/4$  is a sufficient  
405 condition. Allele **C** can even have the weakest direct effect (Fig. 4(a)) and still contribute  
406 to the strengthening of the barrier, in contrast to the case  $\beta < 0$  discussed above. The two  
407 island adaptations share the cost of forming hybrids, making it possible to prevent a strongly  
408 advantageous continental allele to fix on the island, despite their own relatively weak selective  
409 advantage ( $\alpha + \gamma < \beta$ ) (Fig. 4(a)).

410 Not only the maintenance, but also the invasion of the new polymorphism in loose linkage is  
411 strongly affected by the existence of a polymorphism at locus **A**. In its absence, the new mutation  
412 has to overcome the migration cost and the full incompatibility due to **B** being already fixed  
413  $\gamma > m - \epsilon_{BC}$ . In addition, epistasis has an ambiguous effect: it hinders invasion of the new allele  
414 while the formation of the 2-locus genetic barrier requires relatively strong negative epistasis  
415 ( $\epsilon_{BC} < -\beta - m$ ). This ambiguous effect makes invasion and establishment of a genetic barrier  
416 in this setting extremely unlikely. Once a two-locus genetic barrier exists, invasion of a new  
417 allele is however much easier and always possible if migration is sufficiently small (the invasion  
418 criterion tends to  $\gamma$  as  $m \rightarrow 0$ ). Invasion of a third mutation is therefore similar to the previous  
419 case (allele **B** is deleterious on the island).

420 As we have seen, the constraints on the **C** allele are not so severe - but the flip side is that  
421 also the effect on the barrier strength is quite weak: roughly 10% of the direct effect of the **C**  
422 allele for Fig. 4(a) and 5% for Fig. 4(b). In comparison, when all loci are in tight linkage, 100%  
423 of the direct effect of the new mutation contributes to strengthening the genetic barrier.

424 In the supplement, we explore a slightly different scenario, where the new mutation **C** does

425 not interact directly with allele **B** but with allele **a**. Our results show that indirect strengthening  
426 of the genetic barrier, by increasing the marginal fitness of the **A** allele, can be the most efficient  
427 scenario (Fig. C6).

428 **Barrier strength and linkage architecture** Assume now that **A**, **B**, and **C** are placed  
429 without restrictions on recombination distance. For a given set of selection parameters, which  
430 linkage architecture will form the strongest barrier?

431 For a two-locus genetic barrier (loci **A** and **B**), this question has been addressed by Bank  
432 et al. (2012). The main finding there is that selection against migrants is strongest for tight  
433 linkage while selection against hybrids is maximal in loose linkage, when most incompatible  
434 hybrids are produced. With both factors acting, the strongest barrier still results from one of  
435 these extreme architectures:  $m_{max}^{Ab}$  is maximized for tight linkage whenever selection against  
436 migrants is the main driving force. This is the case, in particular, whenever **B** is deleterious  
437 on the island (Fig. C20(a)). In contrast, selection against hybrids is the only viable factor if  
438 the continental type, **aB**, has the highest fitness also on the island. In this case, we obtain the  
439 maximal  $m_{max}^{Ab}$  in loose linkage (Fig. C20(b)). Assuming a genetic barrier can be formed both  
440 in tight and loose linkage, the loose linkage architecture forms the strongest barrier if:

$$\frac{3}{4}\alpha < \beta < \alpha \text{ and } \epsilon_{AB} < \frac{\alpha\beta}{3\alpha - 4\beta} \quad (4)$$

441 In particular, there is never a maximum for intermediate recombination rates.

442 The case of three loci is more complicated because conflicting options can exist, e.g. the  
443 strongest barrier for pairs **A B** and **A C** is obtained with the different loci in tight linkage, but  
444 the strongest barrier for the pair **B C** is generated with the two loci in loose linkage. Still,  
445 numerical analysis suggests that the strongest barrier is obtained at the extreme ends of the  
446 recombination scale, either for  $r \rightarrow 0$  or for  $r \rightarrow \infty$  between pairs of loci. (We were not  
447 able to prove this claim, but did not find any counterexamples in numerical checks, see in SI,  
448 Fig. C24,C25.). In more detail, we find the following: First, assume that **C** appears on the  
449 island. As long as tight linkage among **A** and **B** provides the strongest two-locus barrier, **C**  
450 in tight linkage with **A** and **B** formed the strongest barrier (Fig. 5(a) and 5(b) red area, proof  
451 in section C 3.2.1). Selection against migrants is the key mechanism. If the strongest 2-locus  
452 barrier is shaped by loci **A** and **B** in loose linkage, we obtain the strongest 3-locus barrier for  
453 an additional adaptation **C** that occurs in tight linkage with either **A** or **B**. The new mutation  
454 contributes to a stronger barrier by either strengthening selection against hybrids (blue area,  $\gamma$

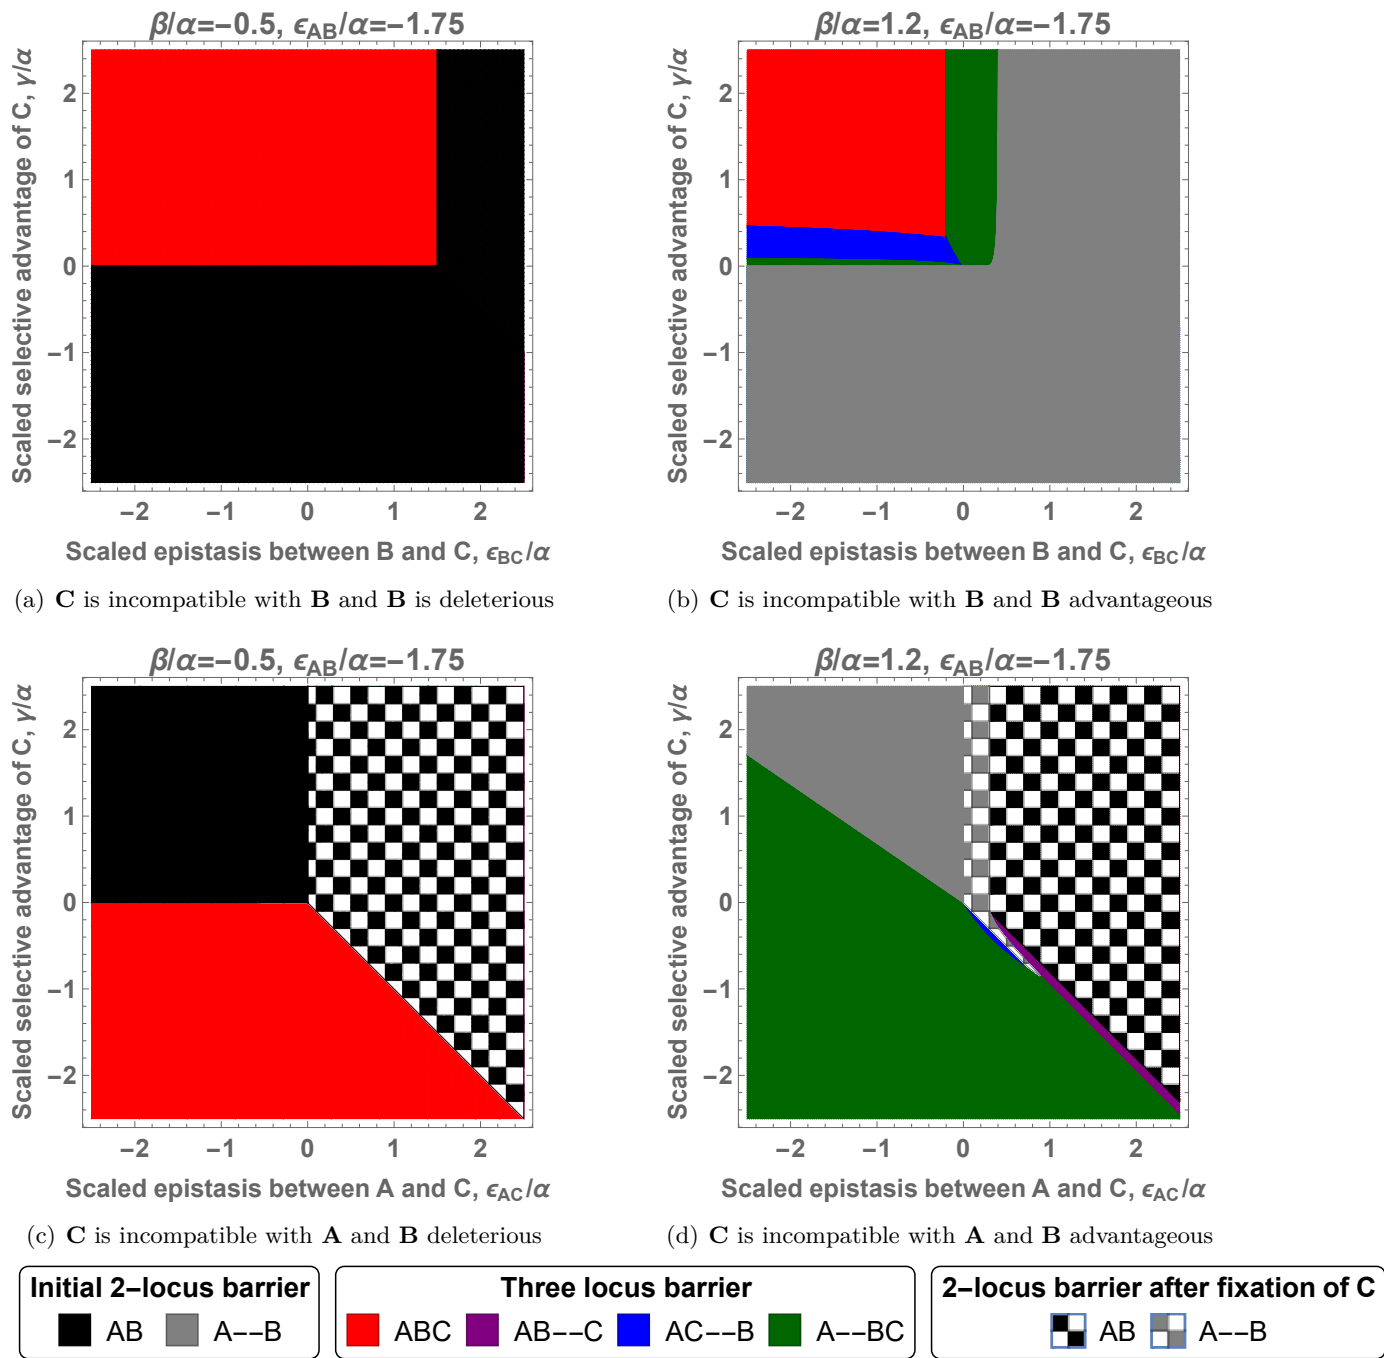

Figure 5: Linkage architecture forming the strongest genetic barrier for three mutations

In each panel, the x-axis corresponds to the epistasis between C and its interacting allele, B for the first row and A for the second row. The y-axis corresponds to the selective advantage of allele C on the island. The different colors indicate the linkage architecture and location a C mutation should appear to maximize  $m_{max}^{Ab}$ . Having all loci in tight linkage can be interpreted as the existence of a single island of divergence and 2 loci in tight linkage and a third one in loose linkage as two islands of divergence, see discussion. The case of three loci in loose linkage is not represented as it never provides the strongest barrier. Analytical expressions for the barrier strengths are given in the SI, equations C7-C14. If the initial barrier remains the strongest when C appears on the continent, it indicates that the new mutation will always weaken the barrier. If C appears on the island, the barrier is unaffected by the presence of the new mutation.

455 small,  $\epsilon_{BC}$  strongly negative), or by strengthening selection against migrants by reducing the  
456 direct effect of the **B** allele (green area,  $\epsilon_{BC}$  close to 0). Fig. 5 shows that the parameter space  
457 for having the strongest barrier in tight linkage is much larger than for loose linkage. However,  
458 genomic regions around any locus that are effectively in tight linkage are small and randomly  
459 placed loci will more likely behave as loosely linked. Therefore, optimal non-local barriers with  
460 loose linkage between 2 loci may be easier to evolve than local (island type) barriers with tight  
461 linkage among all loci.

462 If **C** appears on the continent, we observe similar results, cf. Fig 5(c) and 5(d). Having  
463 all loci in tight linkage forms the strongest barrier as long as the continental adaptations are  
464 deleterious on the island and do not generate positive epistasis (see section C 3.2.2 for proof).  
465 If having all loci in tight linkage does not generate the strongest barrier, then having 2 loci in  
466 tight linkage and the last one in loose linkage offers the strongest genetic barrier, with **C** in  
467 tight linkage with **B**, increasing both selection against migrants and hybrids (green area), or **C**  
468 in tight linkage with **A**, to only strengthen selection against migrants (rare, blue area). Fixing **C**  
469 is another possible mechanism to strengthen the genetic barrier if **C** generates positive epistasis  
470 with **A** (checkered areas). In this last case, the genomic location of locus **C** does not matter.

471 From these results we see that having all loci in loose linkage never seems to be the strongest  
472 linkage architecture in our model. Indeed, we did not find such an architecture despite of  
473 extensive numerical search (although we were not able to prove this). Results can be different  
474 in more complex models. After extending our model to include general 3-locus epistasis, we  
475 were able to construct a case where the strongest barrier has all three loci in loose linkage (cf.  
476 Fig. C23). However, the scenario requires a very specific type of 3-locus interaction (epistasis  
477 between **B** and **C** is only expressed in the absence of **A**) and careful fine-tuning of the selection  
478 parameters.

479 **Extension of a two-locus genetic barrier, diploid populations** Here, we extend our  
480 analysis to diploid populations. More precisely, we are interested in the similarities and dif-  
481 ferences between the haploid and diploid models. The diploid model is quite complex due to  
482 the number of equations and parameters. As mentioned in the model section, we focus on two  
483 specific dominance schemes for the interactions: codominance and recessivity. Despite this sim-  
484 plification, only few cases (mostly when the diploid case reduces to the haploid case) allow for  
485 analytical results. In Fig. 6, we therefore compare numerical results for the strength of migration  
486 barriers.

487 Comparing the migration barriers for the haploid case (Fig. 6(a) and 6(b)) with recessive  
488 diploids (6(c) and 6(d)), we find broad qualitative agreement (if all loci are in tight linkage,  
489  $m_{max}^{Ab}$  for both cases are identical). In particular, adaptation at the **C** locus will weaken or  
490 strengthen the genetic barrier  $m_{max}^{Ab}$  for the same linkage architectures among the three loci,  
491 and in approximately the same parameter ranges. Also having all loci in loose linkage never  
492 seems to generate the strongest barrier for a given set of parameters. Furthermore, for a given  
493 set of parameters, numerical simulations suggest that we will observe qualitatively the same  
494 optimal linkage architectures as in the haploid case when we increase  $\epsilon_{BC}$ .

495 Also the comparison of the haploid case and codominant diploids (Fig. 6(a) and 6(b) vs  
496 6(e) and 6(f)) shows many similarities. For several architectures the dynamics (and thus the  
497 migration barriers) are identical. Indeed, as long as all interacting loci are in loose linkage,  
498 the haploid and diploid codominant model share their dynamics. This result holds for three  
499 different linkage architectures: all loci in loose linkage (orange lines) as well as **A** and **C** in tight  
500 linkage and **B** in loose linkage if **C** appears on the island (blue solid line) or **B** and **C** in tight  
501 linkage and **A** in loose linkage, if **C** appears on the continent (green dashed line). However,  
502 there is one major difference: epistasis between loci in tight linkage can be expressed. This is  
503 most noticeable when all loci are in tight linkage (red lines). Epistasis can be expressed directly  
504 in the F1 generation without any recombination event and therefore the behaviour of DMIs in  
505 tight linkage differs strongly from its haploid or recessive counterparts. Surprisingly, positive  
506 epistasis between **B** and **C**, with **C** appearing on the island, can strengthen the genetic barrier.  
507 One can relate this case to the two-locus 3-alleles model, where we have seen that reducing the  
508 hybrid cost is a viable option to strengthen the genetic barrier. A similar mechanism applies  
509 here as well.

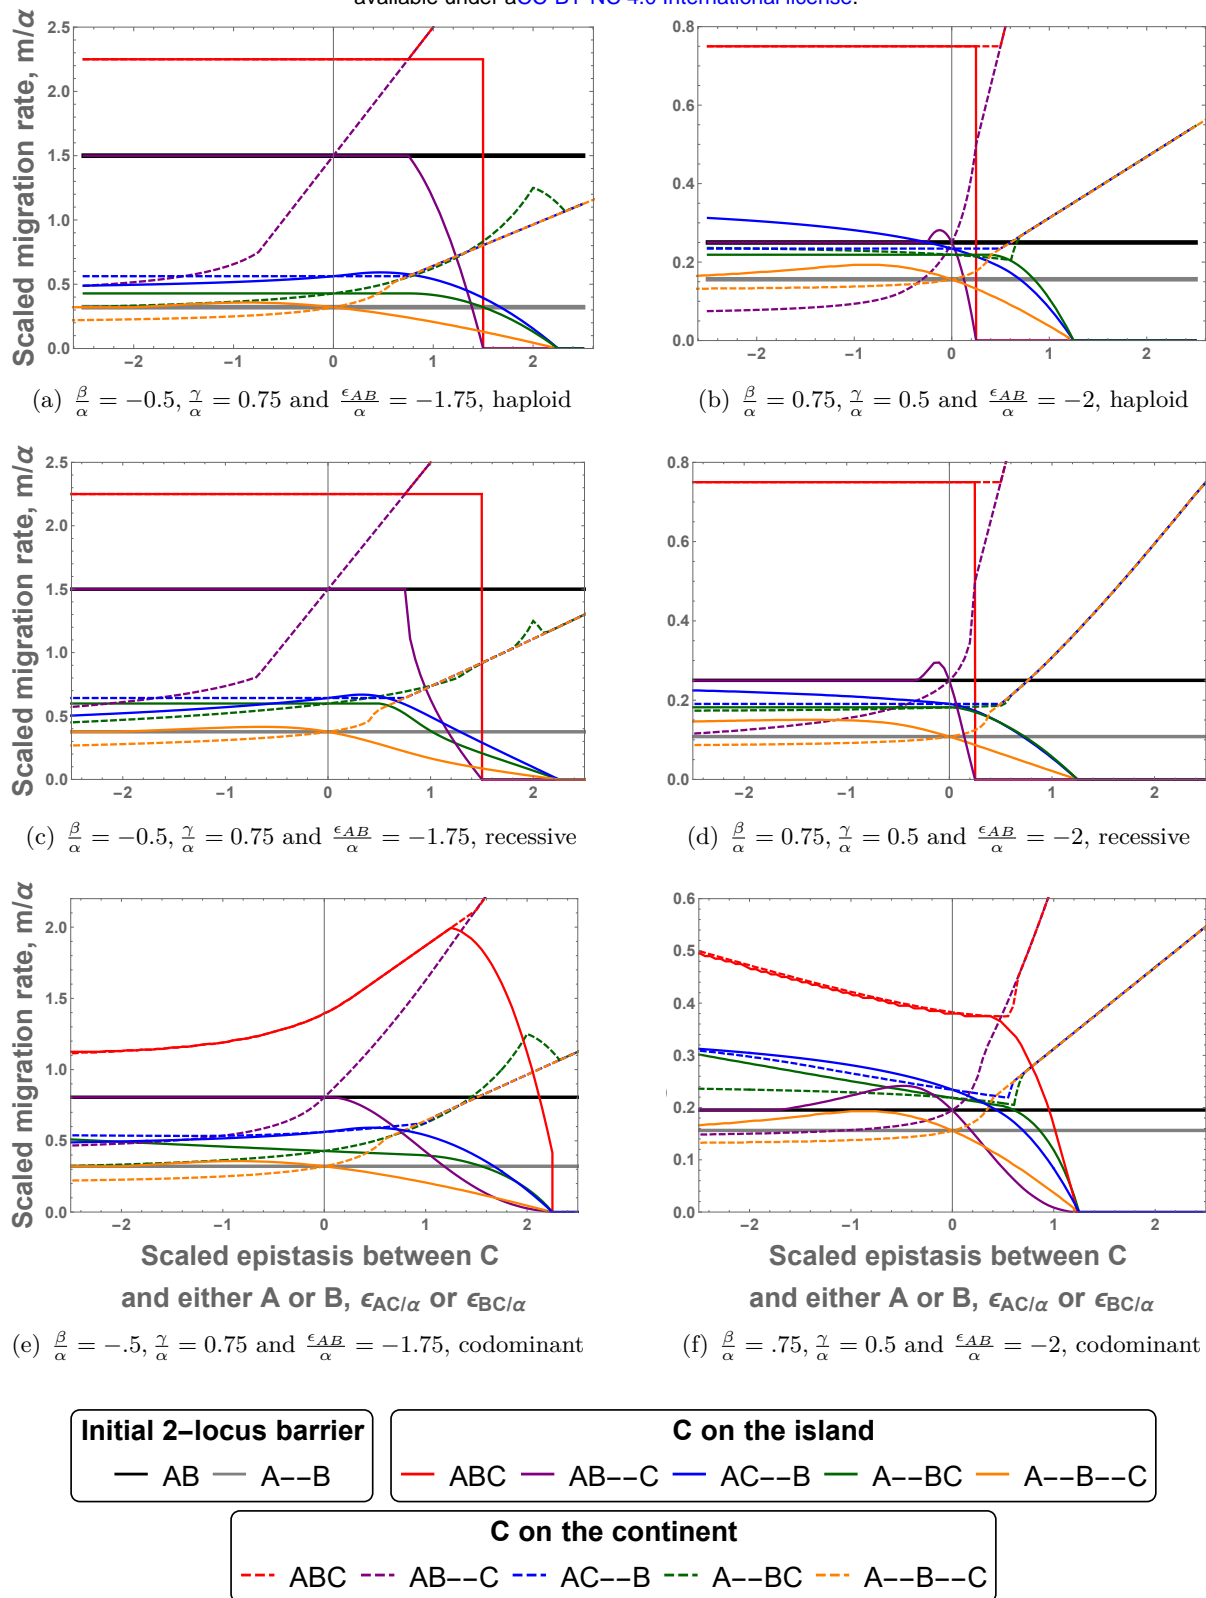

**Figure 6: Maximal migration rate,  $m_{max}^{Ab}$ , in haploid and diploid models**  
 The X-axis corresponds to the epistatic interaction between allele **C** and its interacting allele (either **A** if **C** appears on the continent ( $\frac{\epsilon_{AC}}{\alpha}$ ) or **B** if **C** appears on the island ( $\frac{\epsilon_{BC}}{\alpha}$ )). Both positive and negative epistasis are considered. The Y-axis represents the maximal migration rate for maintenance of the polymorphism at the **A** and **B** loci,  $\frac{m_{max}^{Ab}}{\alpha}$ . Each color corresponds to a different linkage architecture; plain lines indicate that **C** appears on the island, dashed lines on the continent. The black and grey lines serve as reference for a 2-locus genetic barrier between **A** and **B** for tight linkage and loose linkage, respectively. If **C** appears on the continent, we use  $-\gamma$  as its selective advantage to make comparisons with **C** appearing on the island more easier (the fitness differences between the continental haplotype and the best island haplotype are then identical in the absence of epistasis). Qualitatively, the strength of the genetic barrier for given selection parameters is similar for haploid and diploid populations, with the exception of codominant epistasis between pairs of tightly<sup>24</sup> linked loci.



## 510 Discussion

511 How can a genetic barrier build up between two spatially separated populations that are  
512 connected by gene flow? What is the relative role of local adaptation and selection against  
513 hybrids (incompatibilities) in this process? Starting from a genetically homogeneous ancestral  
514 population, the first step of this process requires some amount of local adaptation in order to  
515 protect locally divergent alleles from swamping. For the case of (one or) two additive loci, this  
516 was discussed in detail by Bürger and Akerman (2011) and Aeschbacher and Bürger (2014), and  
517 for two loci with epistasis (allowing for incompatibilities) and unidirectional gene flow by Bank  
518 et al. (2012). Here, we have studied in more detail how a genetic barrier can be extended from  
519 such a first nucleus. As in Bank et al. (2012), we consider the case of unidirectional gene flow  
520 from a continental population to an island population.

521 *A priori*, there is good reason to believe that extending a barrier, once it has been initiated,  
522 should be easier than this first step (Navarro and Barton, 2003; Bank et al., 2012). Indeed, any  
523 existing divergence will reduce the effective migration rate (Barton and Bengtsson, 1986). This  
524 effect is strongest in close linkage to the first divergent locus, but also exists genome-wide;  
525 corresponding to what has been called “divergence hitch-hiking” (Via and West, 2008) and  
526 “genome hitch-hiking” (Feder et al., 2012b), respectively. It is primarily this argument that  
527 triggered the idea of islands of divergence, which may act as nuclei of emergent speciation  
528 (speciation islands, cf. Hawthorne and Via (2001); Via and West (2008); Feder and Nosil (2010);  
529 Nadeau et al. (2012); for confounding effects due to the sorting of ancestral polymorphisms see  
530 Guerrero and Hahn (2017)). If hybrid incompatibilities are involved in the build-up of such a  
531 barrier, there is a second line of argument for a subsequently increased growth of the barrier.  
532 This is the so-called “snowball effect” that predicts the accelerated growth of a genetic barrier  
533 between two allopatric populations, (Orr, 1995; Orr and Turelli, 2001), simply because with  
534 more divergent loci, there are more opportunities for incompatibilities between these loci.

535 Our results shed some light on the probability of observing a snowball effect in parapatry.  
536 Generally, strengthening of a genetic barrier in the presence of gene flow, while possible, is  
537 not an straightforward process, neither for haploid nor diploid populations. Indeed, although  
538 the existence of previous polymorphism can support the establishment of further divergent  
539 alleles in some cases, this process is far from being constraint-free. Furthermore, even if a  
540 new polymorphism succeeds in establishing, this does not imply that the genetic barrier is  
541 strengthened: it can as well be weakened or destroyed.

542 **Strengthening of an already existing genetic barrier** There are two sources from which  
543 a genetic barrier can be built or extended (Bank et al., 2012). On the one hand, selection against  
544 immigrants is effective as long as there is a fitness deficit for the immigrant haplotype relative  
545 to the island haplotype. In this case, selection acts directly to prevent introgression of the  
546 continental alleles on the island. On the other hand, selection against hybrids acts against both  
547 incompatible alleles (continent and island). It still acts as a force against introgression as long  
548 as the proportion of immigrants is small on the island. However, it is less efficient than selection  
549 against immigrants as it only acts indirectly through the selection against hybrid descendants.  
550 It also is associated with a cost for the island haplotype (production of unfit hybrids).

551 In the previous literature, diverse approaches have been used to study the accumulation of di-  
552 vergent alleles in incipient species. Flaxman et al. (2013, 2014) studied speciation with gene flow  
553 in a model without epistasis, purely through the accumulation of genes under local adaptation  
554 (selection against immigrants). As the number of locally adapted mutations increases, effective  
555 gene flow between both populations gradually declines until it reaches a so-called “congealing”  
556 threshold (sensu Turner, 1967; Barton, 1983; Kruuk et al., 1999), where effective migration rates  
557 are almost zero genome-wide and further divergence can occur at an elevated speed. The model  
558 allows for an unlimited number of local adaptation genes and generally leads to very low fitness  
559 of immigrants at (or near) speciation. There is no genetic mechanism to induce speciation in  
560 this setting: given an environment (such as a laboratory) in which both populations can sur-  
561 vive, nothing prevents the production of viable and fertile hybrid offspring. This is at odds with  
562 theories of speciation due to the accumulation of genetic incompatibilities. Indeed, studies of  
563 allopatric speciation typically focus entirely on incompatibilities (and selection against hybrids  
564 after secondary contact) and do not include any local adaptation, e.g. Orr (1995), see also  
565 Paixão et al. (2014). Both mechanisms, selection against immigrants and against hybrids, are  
566 included in the 2-locus study by Bank et al. (2012), which we extend here.

567 Our results can be summarized as follows: first and foremost, we observe clear differences  
568 compared to the allopatric case concerning the accumulation of divergent alleles. Speciation  
569 in the presence of gene flow implies that each new barrier gene does not only compete against  
570 a single wildtype, but is tested against all haplotypes that can be created by gene flow and  
571 recombination. In particular, there is always selection for the reduction of hybrid cost. New  
572 adaptations on the island thus need to be locally beneficial to counter two types of costs: the  
573 direct “migration cost” to withstand swamping by the corresponding continental allele and (in  
574 case of an incompatibility) the hybrid cost. Previous divergence polymorphisms can alleviate the

575 migration cost if a secondary adaptation occurs in close linkage, but not the cost of a stronger  
576 incompatibility. As a consequence, the number of potential barrier genes is strongly reduced  
577 relative to the allopatric case. Furthermore, there is a high probability for each new successful  
578 adaptation, on either the continent or the island, that an existing barrier will be weakened (or  
579 even destroyed) rather than strengthened. We have demonstrated this effect going from one to  
580 three barrier genes. With an increasing number of divergent genes, the constraints due to hybrid  
581 costs should only grow larger, acting against any “snowball effect”, possibly until some sort of  
582 congealing threshold (sensu Flaxman et al. (2014) Nosil et al. (2017)) is reached. Indeed, both  
583 the migration pressure and the cost of generating hybrids act as a sieve on potential new barrier  
584 genes. Due to this sieve, loci involved in DMIs (under parapatric conditions) should have on  
585 average larger direct fitness effects than loci involved in DMIs evolved in allopatry, as it has to  
586 compensate for the different costs. Furthermore, the expression of the different incompatibilities  
587 makes the process reversible as it is possible to lose some barrier genes if further adaptation  
588 reduces the hybrid cost of invading (continental) alleles. Using a model of RNA folding, Kalirad  
589 and Azevedo (2017) also found that DMIs may disappear even in an allopatric context, as further  
590 adaptations may also affect the RNA structure and therefore make the previous interactions void.  
591 Further numerical studies will be needed to quantify these predictions for general many-locus  
592 barriers.

593 **Migration may help to build a stronger genetic barrier to swamping** As explained  
594 above (and as expected), it is usually more difficult to extend a barrier when there is ongoing  
595 gene flow. However, we have shown that sometimes migration is necessary for a new mutation to  
596 invade. Sometimes migration can even promote adaptations (making invasion possible and/or  
597 more likely) that strengthen the genetic barrier to swamping. This can happen if the initial  
598 genetic barrier can be sustained by selection against migrants only, but the incompatibility is  
599 also strong. In that case, a new mutation generating a much weaker incompatibility, but with  
600 a weaker direct effect, can invade and strengthen the genetic barrier to gene flow if migration is  
601 strong enough. This is analogous to a reinforcement process due to pre-zygotic incompatibilities  
602 that is triggered by migration, (Kirkpatrick and Servedio, 1999). In the post-zygotic case, any  
603 adaptation that strengthens the barrier to swamping by lowering the hybrid cost (i.e. weakening  
604 the incompatibility) will make the resulting barrier more dependent on local adaptation and  
605 therefore on differences in the environment. Thus it is questionable whether this is truly a step  
606 towards reproductive isolation.

607 **The strongest genetic barrier for a specific set of loci** For a given set of fitness effects  
608 (both direct and epistatic) at the barrier loci, we can ask which linkage architecture provides  
609 the strongest protection against swamping. In particular: Do we get clusters of linked genes for  
610 optimal architectures?

611 For a two-locus barrier, Bank et al. (2012) have shown that the most stable architecture is  
612 always one with extreme linkage. If the barrier is primarily maintained due to selection against  
613 immigrants, tight linkage ( $r = 0$ ) results in the strongest barrier (this is always the case in  
614 the absence of epistasis (Akerman and Bürger, 2014)). In contrast, the most stable barrier  
615 is obtained with maximally loose linkage (corresponding to  $r \rightarrow \infty$  in the model) if selection  
616 mainly acts against hybrid recombinants.

617 When we extend the 2-locus model to three loci, we can distinguish three patterns with  
618 extreme linkage among pairs of loci: all three loci in tight linkage, two tightly linked loci and one  
619 loosely linked locus, or all three loci loosely linked. We find examples, for each of three patterns  
620 mentioned above, where the considered linkage architecture formed the strongest genetic barrier..  
621 However, the pattern of three loosely linked loci seems to be very rare. We only observe this  
622 result in a custom-made model with 3-way epistasis among the three loci and restricted to a small  
623 parameter range. Usually, we obtain either one or two islands of divergence: one if continental  
624 adaptations are deleterious on the island and two otherwise. As in the 2-locus case, we do  
625 not observe (based on a limited number of numerical studies) an optimal architecture involving  
626 intermediate recombination, even if the genetic barrier is no longer a monotonic function of  
627 recombination and local maxima of the barrier strength as function of the recombination rate  
628 exist in some cases (Fig. C24(b), blue dashed line). Note however that such an optimum at  
629 intermediate recombination distances can occur in stochastic models (Aeschbacher and Bürger,  
630 2014).

631 Although stable architectures will be favored in the presence of gene flow, the most stable  
632 barriers are not necessarily the ones that will evolve most easily in natural populations. For most  
633 selection parameters, two or more loci in tight linkage provide the strongest barrier. However,  
634 the area around each single locus that behaves as essentially tightly linked is usually very small  
635 relative to the size of the genome. Thus, if interacting genes are scattered across random  
636 positions in the genome, stable configurations will be rare. Chromosomal rearrangements such  
637 as inversions can procure larger regions of no recombination, increasing the likelihood of barrier  
638 loci in tight linkage. Navarro and Barton (2003) discussed the importance of such rearrangements  
639 in the speciation process. However, gene conversion can also occur in inversions (Korunes and

640 Noor, 2017). In addition, a study between two *Senecio* species (Brennan et al., 2014) found no  
641 associations between those rearrangements and incompatible genes.

642 New adaptations that appears at loosely linked loci could be transient. As demonstrated  
643 by Yeaman (2013), adaptations that first occur in different genomic regions, can later move  
644 into tight linkage due to genome rearrangement. Indeed, some studies, reviewed in Feder et al.  
645 (2012a), report small regions of divergence hitch-hiking in several species, suggesting that there  
646 may be at least a weak trend for an accumulation of divergent sites. Currently, however, neither  
647 theory nor empirical evidence provide a strong basis for divergence islands as a reliable pattern  
648 for parapatric speciation.

649 **Biological evidence and implications** Growth of a genetic barrier starting from an initial  
650 pairwise DMI could be common in nature. Indeed, Corbett-Detig et al. (2013) reported that  
651 two locus DMIs already exist within populations of the same species, with an average of 1.15  
652 DMIs between different *Drosophila melanogaster* recombinant inbred lines that were derived  
653 from a common parental pool. Segregating incompatibilities have also been found for yeast  
654 (Marsit et al., 2017). This suggests that speciation through the accumulation of post-zygotic  
655 incompatibilities may not start from scratch (a common hypothesis in many models), but can  
656 rely on divergence that already exists between populations. This makes the process investigated  
657 here (how new mutations can strengthen a genetic barrier) a crucial step of the speciation  
658 process.

659 Dettman et al. (2008) evolved populations of *Neurospora* in two different environments. They  
660 crossed individuals that had evolved independently (in allopatry) either in the same environment  
661 (parallel evolution) or in a different environment (divergent evolution). Since crosses between  
662 individuals under different selective pressure tended to generate more unfit individuals, they  
663 concluded that genes involved in early divergence also generate genetic incompatibilities, see  
664 also Kulmuni and Westram (2017). This corresponds to the assumptions of our model. In  
665 addition, in our model we do not consider independent DMIs but partially saturated ones (one  
666 locus involved in two DMIs). Guerrero et al. (2017) provided an example of such saturated  
667 incompatibilities in the pollen of two species of *Solanum* genus.

668 Ono et al. (2017) measured the epistasis between first-step adaptations within a pathway  
669 responsible for fungicide resistance in yeast, with each mutation in a different gene. They  
670 found pervasive epistasis among these mutations, with a third of the interactions classified  
671 as DMIs. Based on these findings, they suggested a scenario of parallel adaptation (without

672 local adaptation) for allopatric speciation with secondary contact: if populations that adapt  
673 in parallel to the same environment (during an allopatric phase) fix different mutations in the  
674 same pathway, incompatibilities can easily be generated. Our model predicts that this kind of  
675 adaptation ( $\alpha \approx \beta$ , i.e. only selection against hybrids) can only be maintained in the face of  
676 gene flow when the DMI loci are far away from each other. This is indeed the case for Ono  
677 et al. (2017): the mutations involved in DMIs occur in genes located on different chromosomes.  
678 In addition, our model (and Bank et al. (2012)) shows that an allopatric phase is not needed  
679 for the evolution of such a DMI: it can also evolve with ongoing unidirectional gene flow given  
680 that the first substitution happens on the island. For bidirectional gene flow, local adaptation  
681 is required. Note that when extended to diploids, the constraint on the linkage architecture  
682 vanishes if the incompatibility is expressed in F1 hybrids (codominant incompatibility).

683 **Model assumptions and possible extensions** Our model relies on a number of hypotheses,  
684 most of them shared with Bank et al. (2012). First, we assume an infinite population size to  
685 ignore the effects of genetic drift. This assumption is adequate as long as the population size is  
686 large enough that drift can be ignored relative to the other evolutionary forces ( $\frac{1}{N} \ll s, m$ ).  
687 We only study whether the mutant can invade or not, but do not consider establishment proba-  
688 bilities. When these are included (Aeschbacher and Bürger (2014) for two loci without epistasis),  
689 the highest establishment probability is often not found for the most stable configuration (tight  
690 linkage in this case), but for small, non-zero recombination rates.

691 We focus entirely on a continent-island model with unidirectional migration. This is realistic  
692 if either physical mechanisms enforce unidirectional gene flow (wind, water current, flowering  
693 time), or if the contribution of both populations to a common migrant pool is strongly biased  
694 (because of unequal population size or because of reduced fertility, e.g. of a marginal population).  
695 If there is weak back migration, the effects described here should still hold, as long as the  
696 island adaptations are not advantageous on the continent. For strong bi-directional migration,  
697 generalist genotypes can gain an advantage and different results are obtained (Akerman and  
698 Bürger, 2014).

699 Due to the complexity of the system, we restrict our analytical analysis to the limiting cases  
700 of recombination ( $r = 0$  and  $r = \infty$ ). Bank et al. (2012) have shown that the analysis of these  
701 limiting cases provides a good understanding of the general case for the 2-locus model. Our  
702 numerical study for intermediate recombination rates confirms this for three loci, Fig. C24, C25.  
703 We assume that all loci are autosomal. Höllinger and Hermisson (2017) provide an analysis of

704 a two-locus DMI in parapatry for organelles and sex chromosomes.

705 Finally, we have restricted our detailed analysis in this paper to epistasis schemes with only  
706 pairwise interactions. Complex epistasis networks with interactions linking three or more loci  
707 offer further routes to strengthen a genetic barrier that will be explored in a forthcoming study.

708 **Acknowledgments** We thank R. Bürger, M. Servedio, C. Vogl, S. Mousset, C. Bank, I.  
709 Fragata, I. Höllinger and the Biomathematics Group at the University of Vienna for helpful  
710 discussion and comments on the manuscript. We thank the two anonymous reviewers for their  
711 valuable suggestions that have improved this manuscript. AB was supported by the Marie Curie  
712 Initial Training Network INTERCROSSING.

## 713 References

714 S. Aeschbacher and R. Bürger. The effect of linkage on establishment and survival of locally  
715 beneficial mutations. *Genetics*, 197(1):317–336, 2014.

716 A. Akerman and R. Bürger. The consequences of gene flow for local adaptation and differ-  
717 entiation: a two-locus two-deme model. *Journal of mathematical biology*, 68(5):1135–1198,  
718 2014.

719 C. Bank, R. Bürger, and J. Hermisson. The Limits to Parapatric Speciation: Dobzhansky–Muller  
720 Incompatibilities in a Continent–Island Model. *Genetics*, 191(3):845–863, 2012.

721 K. Barnard-Kubow, N. So, and L. Galloway. Cytonuclear incompatibility contributes to the  
722 early stages of speciation. *Evolution*, 70(12):2752–2766, 2016.

723 N. Barton. Multilocus Clines. *Evolution*, 37(3):454, 1983.

724 N. Barton and B. Bengtsson. The barrier to genetic exchange between hybridising populations.  
725 *Heredity*, 57(3):357–376, 1986.

726 W. Bateson. Heredity and variation in modern lights. *Darwin and modern science*, pages 85–101,  
727 1909.

728 A. Brennan, S. Hiscock, and R. Abbott. Interspecific crossing and genetic mapping reveal  
729 intrinsic genomic incompatibility between two *Senecio* species that form a hybrid zone on  
730 Mount Etna, Sicily. *Heredity*, 113(3):195–204, 2014.

- 731 R. Bürger and A. Akerman. The effects of linkage and gene flow on local adaptation: A two-locus  
732 continent–island model. *Theoretical population biology*, 80(4):272–288, 2011.
- 733 R. Butlin, J. Galindo, and J. Grahame. Sympatric, parapatric or allopatric: the most important  
734 way to classify speciation? *Philosophical Transactions of the Royal Society B: Biological  
735 Sciences*, 363(1506):2997–3007, 2008.
- 736 R. Butlin, A. Debelle, C. Kerth, R. Snook, L. Beukeboom, C. Castillo, W. Diao, M. Maan,  
737 S. Paolucci, F. Weissing, et al. What do we need to know about speciation? *Trends in  
738 Ecology & Evolution*, 27(1):27–39, 2012.
- 739 R. Corbett-Detig, J. Zhou, A. Clark, D. Hartl, and J. Ayroles. Genetic incompatibilities are  
740 widespread within species. *Nature*, 504(7478):135–137, 2013.
- 741 J. Coyne and H. Orr. *Speciation*. Sinauer Associates Sunderland, MA, 2004.
- 742 J. Dettman, J. Anderson, and L. Kohn. Divergent adaptation promotes reproductive isolation  
743 among experimental populations of the filamentous fungus *Neurospora*. *BMC evolutionary  
744 biology*, 8(1):35, 2008.
- 745 U. Dieckmann. *Adaptive speciation*. Cambridge University Press, 2004.
- 746 U. Dieckmann and M. Doebeli. On the origin of species by sympatric speciation. *Nature*, 400  
747 (6742):354–357, 1999.
- 748 T. Dobzhansky. Studies on hybrid sterility. II. Localization of sterility factors in *Drosophila  
749 pseudoobscura* hybrids. *Genetics*, 21(2):113, 1936.
- 750 J. Feder and P. Nosil. The efficacy of divergence hitchhiking in generating genomic islands  
751 during ecological speciation. *Evolution*, 64(6):1729–1747, 2010.
- 752 J. Feder, S. Egan, and P. Nosil. The genomics of speciation-with-gene-flow. *Trends in Genetics*,  
753 28(7):342–350, 2012a.
- 754 J. Feder, R. Gejji, S. Yeaman, and P. Nosil. Establishment of new mutations under diver-  
755 gence and genome hitchhiking. *Philosophical Transactions of the Royal Society B: Biological  
756 Sciences*, 367(1587):461–474, 2012b.
- 757 S. Flaxman, J. Feder, and P. Nosil. Genetic hitchhiking and the dynamic buildup of genomic  
758 divergence during speciation with gene flow. *Evolution*, 67(9):2577–2591, 2013.



- 759 S. Flaxman, A. Wacholder, J. Feder, and P. Nosil. Theoretical models of the influence of genomic  
760 architecture on the dynamics of speciation. *Molecular ecology*, 23(16):4074–4088, 2014.
- 761 C. Fraïsse, J. Elderfield, and J. Welch. The genetics of speciation: are complex incompatibilities  
762 easier to evolve? *Journal of evolutionary biology*, 27(4):688–699, 2014.
- 763 S. Gavrilets. Hybrid zones with Dobzhansky-type epistatic selection. *Evolution; international*  
764 *journal of organic evolution*, 51(4):1027–1035, 1997.
- 765 R. Guerrero and M. Hahn. Speciation as a sieve for ancestral polymorphism. *Molecular Ecology*,  
766 26(20):5362–5368, 2017.
- 767 R. Guerrero, C. Muir, S. Josway, and L. Moyle. Pervasive antagonistic interactions among  
768 hybrid incompatibility loci. *PLoS Genetics*, 13(6):e1006817, 2017.
- 769 D. Hawthorne and S. Via. Genetic linkage of ecological specialization and reproductive isolation  
770 in pea aphids. *Nature*, 412(6850):904–907, 2001.
- 771 I. Höllinger and J. Hermisson. Bounds to parapatric speciation: A Dobzhansky–Muller incom-  
772 patibility model involving autosomes, X chromosomes, and mitochondria. *Evolution*, 71(5):  
773 1366–1380, 2017.
- 774 A. Kalirad and R. Azevedo. Spiraling Complexity: A Test of the Snowball Effect in a Compu-  
775 tational Model of RNA Folding. *Genetics*, 206(1):377–388, 2017.
- 776 M. Kirkpatrick and M. Servedio. The reinforcement of mating preferences on an island. *Genetics*,  
777 151(2):865–884, 1999.
- 778 K. Korunes and M. Noor. Gene conversion and linkage: effects on genome evolution and speci-  
779 ation. *Molecular Ecology*, 26(1):351–364, 2017.
- 780 L. Kruuk, S. Baird, K. Gale, and N. Barton. A comparison of multilocus clines maintained by  
781 environmental adaptation or by selection against hybrids. *Genetics*, 153(4):1959–1971, 1999.
- 782 J. Kulmuni and A M Westram. Intrinsic incompatibilities evolving as a by-product of divergent  
783 ecological selection: Considering them in empirical studies on divergence with gene flow.  
784 *Molecular Ecology*, 26(12):3093–3103, 2017.
- 785 J. Mallet. Hybridization as an invasion of the genome. *Trends in ecology & evolution*, 20(5):  
786 229–237, 2005.

- 787 S. Marsit, J.e Leducq, E Durand, A. Marchant, M. Filteau, and C. Landry. Evolutionary biology  
788 through the lens of budding yeast comparative genomics. *Nature Reviews Genetics*, 2017.
- 789 H. Muller. Isolating mechanisms, evolution and temperature. In *Biol. Symp*, volume 6, pages  
790 71–125, 1942.
- 791 N. Nadeau, A. Whibley, R. Jones, J. Davey, K. Dasmahapatra, S. Baxter, M. Quail, M. Joron,  
792 M. Blaxter, J. Mallet, et al. Genomic islands of divergence in hybridizing *Heliconius* butterflies  
793 identified by large-scale targeted sequencing. *Phil. Trans. R. Soc. B*, 367(1587):343–353, 2012.
- 794 T. Nagylaki and Y. Lou. Patterns of multiallelic polymorphism maintained by migration and  
795 selection. *Theoretical Population Biology*, 59(4):297–313, 2001.
- 796 A. Navarro and N. Barton. Accumulating postzygotic isolation genes in parapatry: a new twist  
797 on chromosomal speciation. *Evolution*, 57(3):447–459, 2003.
- 798 P. Nosil, J. Feder, S. Flaxman, and Z. Gompert. Tipping points in the dynamics of speciation.  
799 *Nature Ecology & Evolution*, 1(2), 2017.
- 800 J. Ono, A. Gerstein, and S. Otto. Widespread Genetic Incompatibilities between First-Step  
801 Mutations during Parallel Adaptation of *Saccharomyces cerevisiae* to a Common Environment.  
802 *PLoS biology*, 15(1):e1002591, 2017.
- 803 H. Orr. The population genetics of speciation: the evolution of hybrid incompatibilities. *Genet-*  
804 *ics*, 139(4):1805–1813, 1995.
- 805 H. Orr and M. Turelli. The evolution of postzygotic isolation: accumulating Dobzhansky-Muller  
806 incompatibilities. *Evolution*, 55(6):1085–1094, 2001.
- 807 T. Paixão, K. Bassler, and R. Azevedo. Emergent speciation by multiple Dobzhansky-Muller  
808 incompatibilities. *bioRxiv*, page 008268, 2014.
- 809 A. Rettelbach, M. Kopp, U. Dieckmann, and J. Hermisson. Three modes of adaptive speciation  
810 in spatially structured populations. *The American Naturalist*, 182(6):E215–E234, 2013.
- 811 D. Schluter. Evidence for ecological speciation and its alternative. *Science*, 323(5915):737–741,  
812 2009.
- 813 O. Seehausen, R. Butlin, I. Keller, C. Wagner, J. Boughman, P. Hohenlohe, C. Peichel, G. Saetre,  
814 C. Bank, A. Brannstrom, A. Brelsford, . Clarkson, F. Eroukhmanoff, J. Feder, M. Fischer,

- 815 A. Foote, P. Franchini, C. Jiggins, F. Jones, A. Lindholm, K. Lucek, M. Maan, D. Mar-  
816 ques, S. Martin, B. Matthews, J. Meier, Ma. Most, M. Nachman, E. Nonaka, D. Rennison,  
817 J. Schwarzer, E. Watson, A. Westram, and A. Widmer. Genomics and the origin of species.  
818 *Nat Rev Genet*, 15(3):176–192, 2014.
- 819 M. Servedio and M. Noor. The role of reinforcement in speciation: Theory and data. *Annual*  
820 *Review of Ecology, Evolution, and Systematics*, 34(Noor 1999):339–364, 2003.
- 821 M. Turelli and H. Orr. Dominance, epistasis and the genetics of postzygotic isolation. *Genetics*,  
822 154(4):1663–79, 2000.
- 823 J. Turner. Why does the genotype not congeal? *Evolution*, 21(4), 1967.
- 824 S. Via and J. West. The genetic mosaic suggests a new role for hitchhiking in ecological specia-  
825 tion. *Molecular Ecology*, 17(19):4334–4345, 2008.
- 826 F. Weissing, P. Edelaar, and G. Van Doorn. Adaptive speciation theory: a conceptual review.  
827 *Behavioral ecology and sociobiology*, 65(3):461–480, 2011.
- 828 M. Yang, Z. He, S. Shi, and C. Wu. Can genomic data alone tell us whether speciation happened  
829 with gene flow? *Molecular Ecology*, 26(11):2845–2849, 2017.
- 830 S. Yeaman. Genomic rearrangements and the evolution of clusters of locally adaptive loci.  
831 *Proceedings of the National Academy of Sciences*, 110(19):E1743–E1751, 2013.
